# Supplementary material for: Organocatalyzed stereospecific C–C bond formation of β-lactams
Source: Royal Society of Chemistry journal article supplement (doi:10.1039/c3ob41858h), 2013-11-04

## Supporting information

### Organocatalyzed stereospecific C-C bond formation of $\beta$ -lactams

Sachin A. Pawar,<sup>a</sup> Saba Alapour,<sup>a</sup> Sibusiso Khanyase,<sup>a</sup> Zamani E. D. Cele,<sup>a</sup> Srinivas Chitti,<sup>a</sup>  
Hendrik G. Kruger,<sup>a</sup> Thavendran Govender,<sup>\*a</sup> and Per I. Arvidsson<sup>\*a,b</sup>

<sup>a</sup> Catalysis and Peptide Research Unit, University of KwaZulu Natal, Durban, South Africa. Tel: +27 312601845; E-mail: govenderthav@ukzn.ac.za

<sup>b</sup> Science for Life Laboratory, Drug Discovery and Development Platform & Division of Translational Medicine and Chemical Biology, Department of Medical Biochemistry and Biophysics, Karolinska Institutet, Stockholm, Sweden. Tel: +46 852481398; E-mail: per.arvidsson@scilifelab.se

#### Contents:

##### 1. NMR

##### 2. Experimental

|                                                              |   |
|--------------------------------------------------------------|---|
| 1a. General procedure for Aldol Reaction.....                | 2 |
| 1b. General procedure for Mannich Reaction.....              | 3 |
| 1c. General procedure for Michael Reaction.....              | 4 |
| 3. <sup>1</sup> H, <sup>13</sup> C NMR and HRM Spectra ..... | 5 |

## 1. NMR

The observed NOE interaction between H<sub>4</sub> and H<sub>18</sub> in Mannich compound **9** that confirms the absolute configuration at C<sub>8</sub> is presented in Figure 1. This long range interaction (black arrow) supports the presence of similar configuration at C<sub>8</sub> like Aldol reaction (See Figure 1).

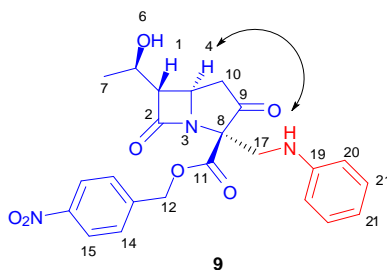

**Figure 1.** Long range interaction in compound **9**

## 2. Experimental

Reagents and solvents were purchased from Sigma Aldrich and Fluka Chemicals. All NMR spectra were recorded on Bruker AVANCE III 400 MHz instrument. The chemical shifts are expressed in ppm downfield from TMS as the internal standard and the coupling constants are reported in Hertz. Thin layer chromatography was performed using Merck Kieselgel 60 F254. Compounds were purified by column chromatography packed with 60-200 mesh Silica gel and Shimadzu C18 column prep HPLC. Optical rotations were recorded on a Perkin-Elmer Polarimeter (Model 341). High resolution spectrometric data were obtained using Bruker maxis 4G instrument operating at ambient temperatures.

### 1a. General Procedure for Aldol reaction

A mixture of compound **1** (1.0 eq) and aldehyde (10.0 eq) was stirred in the presence of catalyst (0.2 eq) and acetic acid (0.2 eq) at room temperature. Pyrrolidine, L-proline and D-proline were used in turns as catalysts in the reactions for all the substrates that were tested. The reaction progress was monitored using TLC and LCMS, on completion the reactions were quenched using water and extracted with DCM (30 mL x 3). The extracts were dried with Mg<sub>2</sub>SO<sub>4</sub>, which was subsequently removed by filtration. The solvent was removed under reduced pressure, and the crude product mixture was purified by column chromatography. The structure was confirmed using NMR and Mass.

#### **(2*S*,5*R*,6*S*)-4-nitrobenzyl 6-((*R*)-1-hydroxyethyl)-2-(hydroxymethyl)-3,7-dioxo-1-azabicyclo[3.2.0]heptane-2-carboxylate (2)**

The crude product was purified by column chromatography (ethyl acetate/hexane, 70:30; R<sub>f</sub> = 0.3) to afford the product (76%) as a colorless oil.  $[\alpha]_{20}^D = -26.6$  (*c* = 0.1, CHCl<sub>3</sub>) <sup>1</sup>H NMR (400 MHz, DMSO): δ 8.26 (d, *J* = 8.56 Hz, 2H), 7.69 (d, *J* = 8.56 Hz, 2H), 5.86 (s, 1H), 5.37 (s, 1H), 5.32 (dd, *J* = 9.37 Hz, 2H), 4.48 – 4.49 (m, 1H), 4.17 (p, 1H), 2.95 – 3.04 (m, 2H), 2.58 (q, *J* = 16.87, *J* = 9.62, 1H), 1.33 (d, *J* = 6.28 Hz, 3H); <sup>13</sup>C NMR (100 MHz DMSO): δ 171.9, 166.1, 161.9, 148.1, 143.8, 131.6, 128.3, 124.3, 114.1, 65.5, 63.5, 62.6, 52.9, 37.4, 21.6; HRMS (ESI-) *m/z* calcd. for C<sub>17</sub>H<sub>18</sub>N<sub>2</sub>O<sub>8</sub>: 377.0979; found [M-H] 377.1391

#### **(2*S*,5*R*,6*S*)-4-nitrobenzyl 2-((*R*)-hydroxy(phenyl)methyl)-6-((*R*)-1-hydroxyethyl)-3,7-dioxo-1-azabicyclo[3.2.0]heptane-2-carboxylate (3)**

The crude product was purified by column chromatography (ethyl acetate /hexane, 70:30; R<sub>f</sub> = 0.2) to afford the product (60%) as a semisolid.  $[\alpha]_{20}^D = +20.0$  (*c* = 0.1, CHCl<sub>3</sub>) <sup>1</sup>H NMR (600 MHz, DMSO): δ 8.25 (d, *J* = 8.52 Hz, 2H), 7.74 (d, *J* = 8.52 Hz, 2H), 7.69 (m, 2H), 7.53 (s, 1H), 7.42 (m, 3H), 5.41 (s, 2H), 4.35 (m, 1H), 3.96 (m, 1H), 3.02 (d.d, *J* = 2.58, 6.3 Hz, 1H), 2.61 (m, 2H), 1.13 (d, *J* = 8.52 Hz, 3H); <sup>13</sup>C NMR (150 MHz DMSO): δ 172.5, 167.2, 163.3, 147.2, 143.6, 136.4, 132.3, 130.3, 128.6, 128.6,

128.3, 122.6, 65.5, 63.9, 62.3, 53.5, 38.0, 22.3; HRMS (ESI-)  $m/z$  calcd. for  $C_{23}H_{22}N_2O_8$ : 453.1292; found [M-H] 453.1694

### 1b. General Procedure for Mannich reaction

To a stirred solution of formaldehyde (2.0 eq, 36% aqueous solution) in DMSO (3 mL), substituted amine (2.0 eq) was added at ambient temperature. After 2 h, the compound **1** (1.0 eq) and catalyst (0.3 eq) were added and the reaction mixture was stirred for 20 h while being monitored using TLC. The reaction mixture was then quenched by addition of PBS buffer (1 mL), water (3 mL) and the aqueous phase was extracted three times with EtOAc. The combined organic layers were dried with  $Mg_2SO_4$ , which was subsequently removed by filtration. Next, the solvent was removed under reduced pressure, and the crude product mixture was purified by column chromatography.

#### (2*S*,5*R*,6*S*)-4-nitrobenzyl 6-((*R*)-1-hydroxyethyl)-3,7-dioxo-2-((phenylamino)methyl)-1-azabicyclo[3.2.0]heptane-2-carboxylate (**9**)

The crude product was purified by column chromatography (EtOAc/hexane, 80:20;  $R_f$  = 0.4) to afford the product (55%) as a semisolid.  $[\alpha]_{20}^D = -30.0$  ( $c = 0.1$ ,  $CHCl_3$ )  $^1H$  NMR (400 MHz,  $CDCl_3$ ):  $\delta$  = 8.21 (d,  $J = 8.64$  Hz, 2 H), 7.70 (s, 1 H), 7.51 (d,  $J = 8.60$  Hz, 2H), 7.45 (d,  $J = 7.88$  Hz, 2 H), 7.30 (t,  $J = 7.82$  Hz, 2 H), 7.12 (t,  $J = 7.38$  Hz, 1 H), 6.14 (s, 1 H), 6.04 (s, 1 H), 5.29 (d,  $J = 9.72$  Hz, 2 H), 4.60 (m, 1 H), 4.17 (m, 1 H), 3.06 (m, 1 H), 3.04 (m, 1 H), 2.66 (d.d,  $J = 15.84$  and 9.52 Hz, 1 H), 1.37 (d,  $J = 6.16$  Hz, 3 H) ppm.  $^{13}C$  NMR (100 MHz,  $CDCl_3$ ):  $\delta$  = 168.3, 165.5, 162.1, 148.0, 142.2, 137.2, 130.8, 129.2, 128.6, 125.1, 124.0, 120.2, 115.7, 66.9, 66.0, 64.8, 55.7, 40.2, 21.6 ppm. HRMS (ESI+)  $m/z$  calcd. for  $C_{23}H_{23}N_3O_7$ : 454.1608; found [M+H] 454.2985

#### (2*S*,5*R*,6*S*)-4-nitrobenzyl 6-((*R*)-1-hydroxyethyl)-2-((4-methoxyphenylamino)methyl)-3,7-dioxo-1-azabicyclo[3.2.0]heptane-2-carboxylate (**10**)

The crude product was purified by column chromatography (EtOAc/hexane, 80:20;  $R_f$  = 0.4) to afford the product (52%) as a semisolid.  $[\alpha]_{20}^D = -50.0$  ( $c = 0.1$ ,  $CHCl_3$ )  $^1H$  NMR (400 MHz, DMSO):  $\delta$  = 9.87 (s, 1 H), 8.20 (d,  $J = 8.72$  Hz, 2 H), 7.66 (d,  $J = 8.72$  Hz, 2 H), 7.40 (d,  $J = 9.00$  Hz, 2 H), 6.83 (d,  $J = 9.00$  Hz, 2H), 5.83 (d,  $J = 9.96$  Hz, 2 H), 5.31 (s, 2 H), 5.03 (d,  $J = 4.40$  Hz, 2 H), 4.53-4.49 (m, 1 H), 3.97 (q,  $J = 16.24$ , and 5.44 Hz, 1 H) 1 H), 3.69 (s, 3 H), 3.11 (dd,  $J = 5.30$  and 2.38 Hz, 1 H), 2.77-2.69 (m, 2H), 1.10 (d,  $J = 6.32$  Hz, 3 H) ppm.  $^{13}C$  NMR (100 MHz, DMSO):  $\delta$  = 167.5, 166.0, 161.8, 155.2, 147.1, 143.2,

131.9, 131.5, 128.5, 123.5, 120.7, 113.7, 113.5, 65.4, 63.4, 62.7, 55.0, 40.1, 21.6 ppm. HRMS (ESI+)  $m/z$  calcd. for  $C_{24}H_{25}N_3O_8$ : 484.1714; found [M+H] 484.1712

**(2*S*,5*R*,6*S*)-4-nitrobenzyl 2-((4-bromophenylamino)methyl)-6-((*R*)-1-hydroxyethyl)-3,7-dioxo-1-azabicyclo[3.2.0]heptane-2-carboxylate (11)**

The crude product was purified by column chromatography (EtOAc/hexane, 80:20;  $R_f = 0.4$ ) to afford the product (50%) as a semisolid.  $[\alpha]_{20}^D = -70.0$  ( $c = 0.1$ ,  $CHCl_3$ )  $^1H$  NMR (400 MHz,  $CDCl_3$ ):  $\delta = 8.23$  (d,  $J = 8.52$  Hz, 2 H), 7.78 (s, 1 H), 7.52 (d,  $J = 8.52$  Hz, 2 H), 7.41-7.35 (m, 4H), 6.17 (s, 1H), 6.06 (s, 1H), 5.29 (q,  $J = 19.74$  and 47.06 Hz, 2 H), 4.61-4.59 (m, 1 H), 4.20-4.16 (m, 1 H), 3.06 (dd,  $J = 19.26$  and 11.34 Hz, 1 H), 2.68-2.64 (m, 2H), 1.37 (d,  $J = 6.12$  Hz, 3 H) ppm.  $^{13}C$  NMR (100 MHz,  $CDCl_3$ ):  $\delta = 168.2$ , 165.4, 162.1, 148.0, 142.1, 136.3, 132.2, 130.7, 128.6, 124.1, 121.7, 117.7, 115.8, 66.9, 64.7, 55.6, 40.4, 21.6 ppm. HRMS (ESI-)  $m/z$  calcd. for  $C_{23}H_{22}BrN_3O_7$ : 530.0557; found [M-H] 530.0612

**1c. General Procedure for Michael reaction**

To a stirred solution of compound **1** (1.0 eq) and catalyst (0.2 eq) in DMSO (0.5 mL) at room temperature, was added nitrostyrene or cyclopentenone (2.0 eq). The mixture was stirred at ambient temperature for 24 h while being monitored by TLC. The reaction mixture was then quenched by adding water (5 mL) and the aqueous layer was extracted three times with DCM (30 mL). The combined organic layers were dried with  $Mg_2SO_4$  which was subsequently removed by filtration. The concentrated extract was subjected to silica gel for purification to afford the desired product.

**(2*S*,5*R*,6*S*)-4-nitrobenzyl 6-((*R*)-1-hydroxyethyl)-2-((*S*)-1-(4-methoxyphenyl)-2-nitroethyl)-3,7-dioxo-1-azabicyclo [3.2.0] heptane-2-carboxylate (12)**

The crude product was purified by column chromatography (EtOAc/hexane, 50:50;  $R_f = 0.2$ ) to afford the product (41%) as a Pale yellow powder.  $[\alpha]_{20}^D = +156.7$  ( $c = 0.1$ ,  $CHCl_3$ )  $^1HNMR$  (400 MHz,  $CDCl_3$ ):  $\delta = 8.24$  (d,  $J = 8.60$  Hz, 2H), 7.48 (d,  $J = 8.60$  Hz, 2H), 7.21 (d,  $J = 8.68$  Hz, 2H), 6.82 (d,  $J = 8.72$  Hz, 2H), 5.32 (m, 2H), 5.00 (dd,  $J = 13.17$ , 11.17 Hz, 2H), 4.36 (dd,  $J = 11.11$ , 4.10 Hz, 1H), 4.10 (m, 1H), 3.56 (m, 1H), 3.12 (dd,  $J = 5.20$ , 2.56 Hz, 1H), 2.43 (dd,  $J = 8.80$ , 8.72 Hz, 1H), 2.27 (dd,  $J = 6.88$ , 6.96 Hz, 1H), 1.29 (d,  $J = 6.28$  Hz, 3H) ppm.  $^{13}C$  NMR (100 MHz  $CDCl_3$ ):  $\delta = 207.3$ , 171.5, 164.9, 160.9, 141.7, 131.7, 129.1, 124.1, 114.5, 94.5, 74.3, 67.3, 67.1, 55.4, 55.0, 51.1, 44.1, 40.5, 21.2 ppm. HRMS (ESI+)  $m/z$  calcd. for  $C_{25}H_{25}N_3O_{10}$ : 528.1612; found [M+H] 528.3154

**(2*S*,5*R*,6*S*)-4-nitrobenzyl**                      **6-((*R*)-1-hydroxyethyl)-3,7-dioxo-2-((*R*)-3-oxocyclopentyl)-1-azabicyclo[3.2.0]heptane-2-carboxylate (13)**

The crude product was purified by column chromatography (EtOAc/hexane, 50:50;  $R_f = 0.2$ ) to afford the product (67%) as a White powder.  $[\alpha]_{20}^D = +215.0$  ( $c = 0.1$ ,  $\text{CHCl}_3$ )  $^1\text{H NMR}$  (400 MHz,  $\text{CDCl}_3$ ):  $\delta$  8.22 (d,  $J = 7.16$  Hz, 2H), 7.45 (d,  $J = 8.56$  Hz, 2H), 5.27 (s, 2H), 4.25 (s, 1H), 4.03 (s, 1H), 3.29 (t, 1H), 3.17 (d, 1H), 2.97- 2.95 (d,  $J = 11.05$  Hz, 1H), 2.55- 2.39 (dd,  $J = 17.91, 8.58$  Hz, 2H), 2.19 (d,  $J = 9.49$  Hz, 2H), 2.04 (d,  $J = 7.08$  Hz, 1H), 1.80 (d,  $J = 19.61$  Hz, 1H), 1.34 (d,  $J = 4.80$  Hz, 3H) ppm.  $^{13}\text{C NMR}$  (100 MHz  $\text{CDCl}_3$ ):  $\delta$  215.3, 208.0, 164.9, 161.0, 140.8, 128.7, 124.5, 76.6, 66.5, 66.2, 64.9, 50.2, 42.1, 40.9, 38.4, 38.0, 23.6, 21.9 1 ppm. HRMS (ESI-)  $m/z$  calcd. for  $\text{C}_{21}\text{H}_{22}\text{N}_2\text{O}_8$ : 429.1292; found [M-H] 429.1442

<sup>1</sup>H-NMR spectra of ((2*S*)-4-nitrobenzyl-6-((*R*)-1-hydroxyethyl)-2-(hydroxymethyl)-3,7-dioxo-1-azabicyclo[3.2.0]heptane-2-carboxylate)

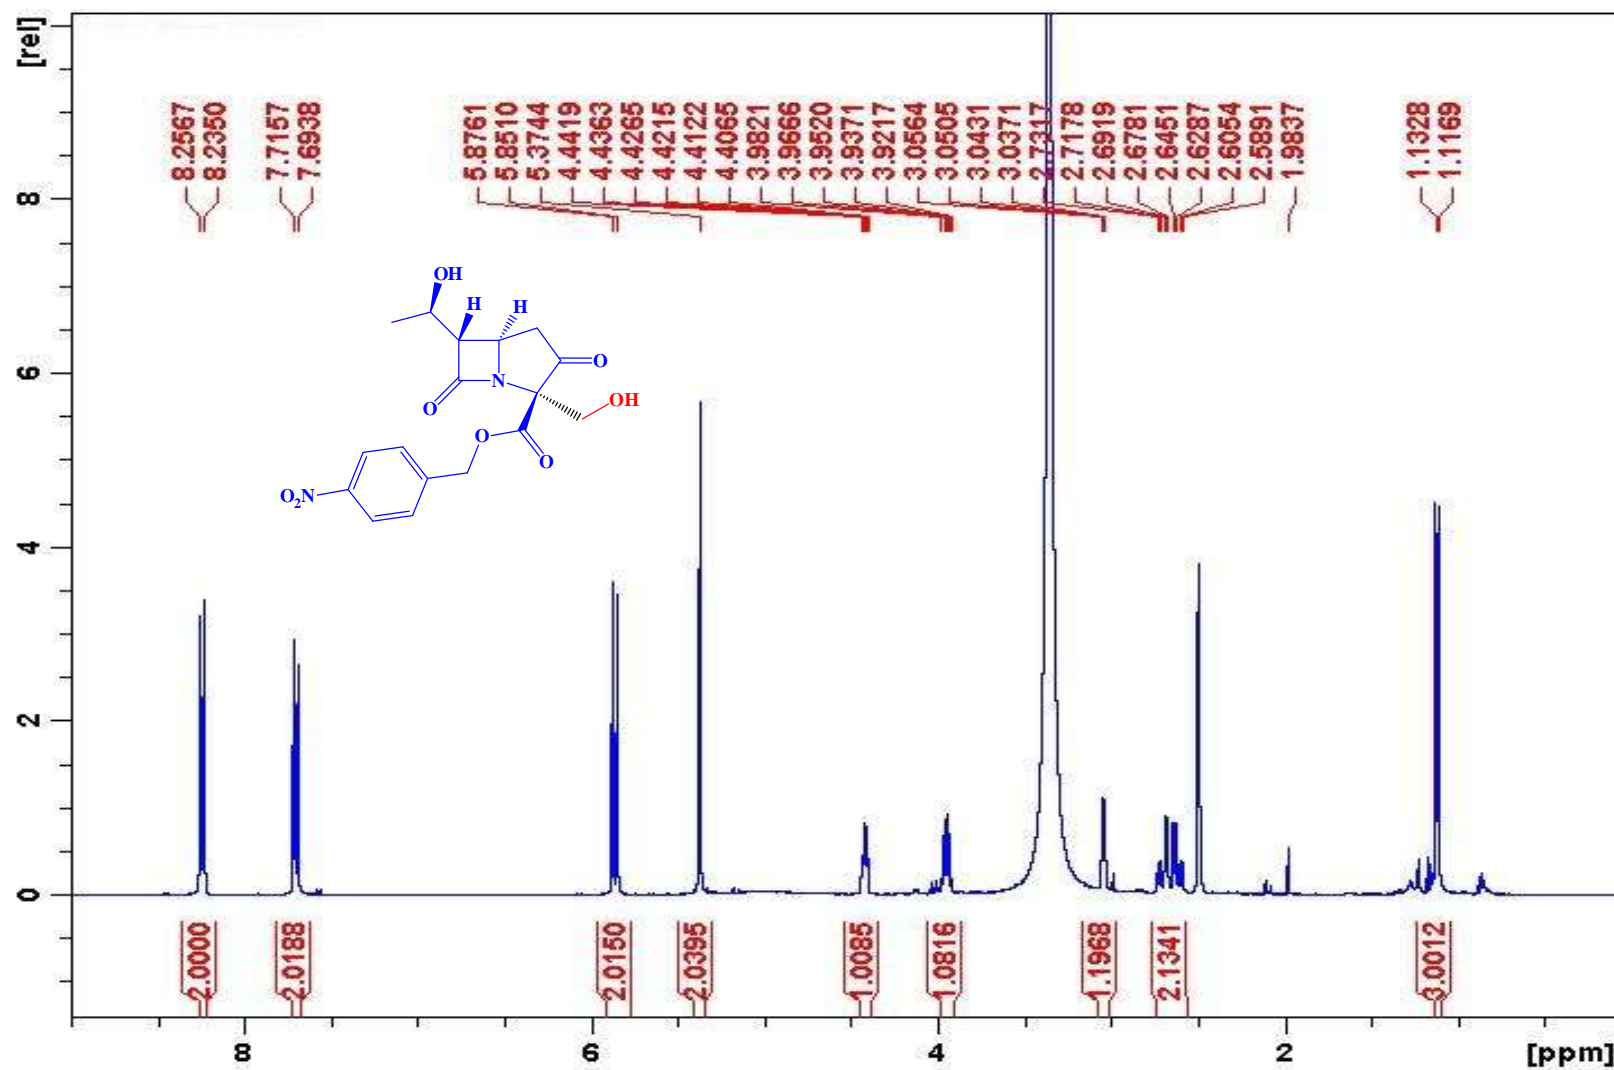

<sup>13</sup>C-NMR spectra of ((2*S*)-4-nitrobenzyl-6-((*R*)-1-hydroxyethyl)-2-(hydroxymethyl)-3,7-dioxo-1-azabicyclo[3.2.0]heptane-2-carboxylate

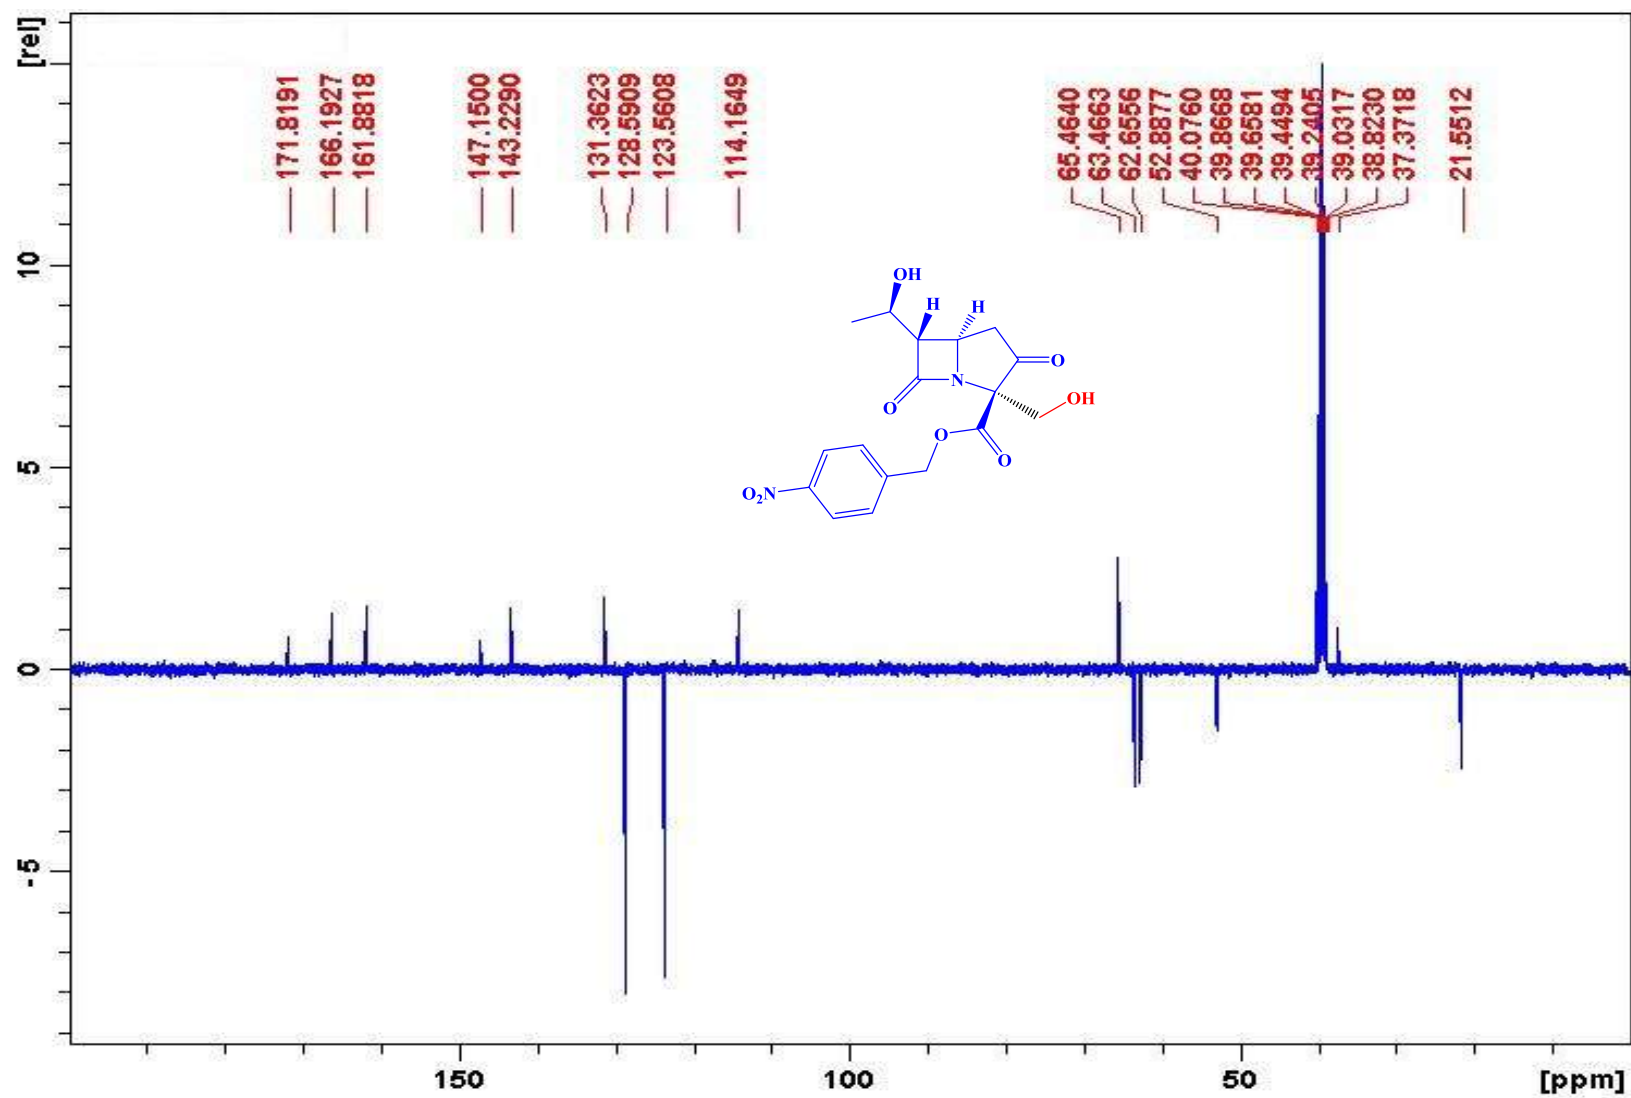



COSY of ((2*S*)-4-nitrobenzyl-6-((*R*)-1-hydroxyethyl)-2-(hydroxymethyl)-3,7-dioxo-1-azabicyclo[3.2.0]heptane-2-carboxylate

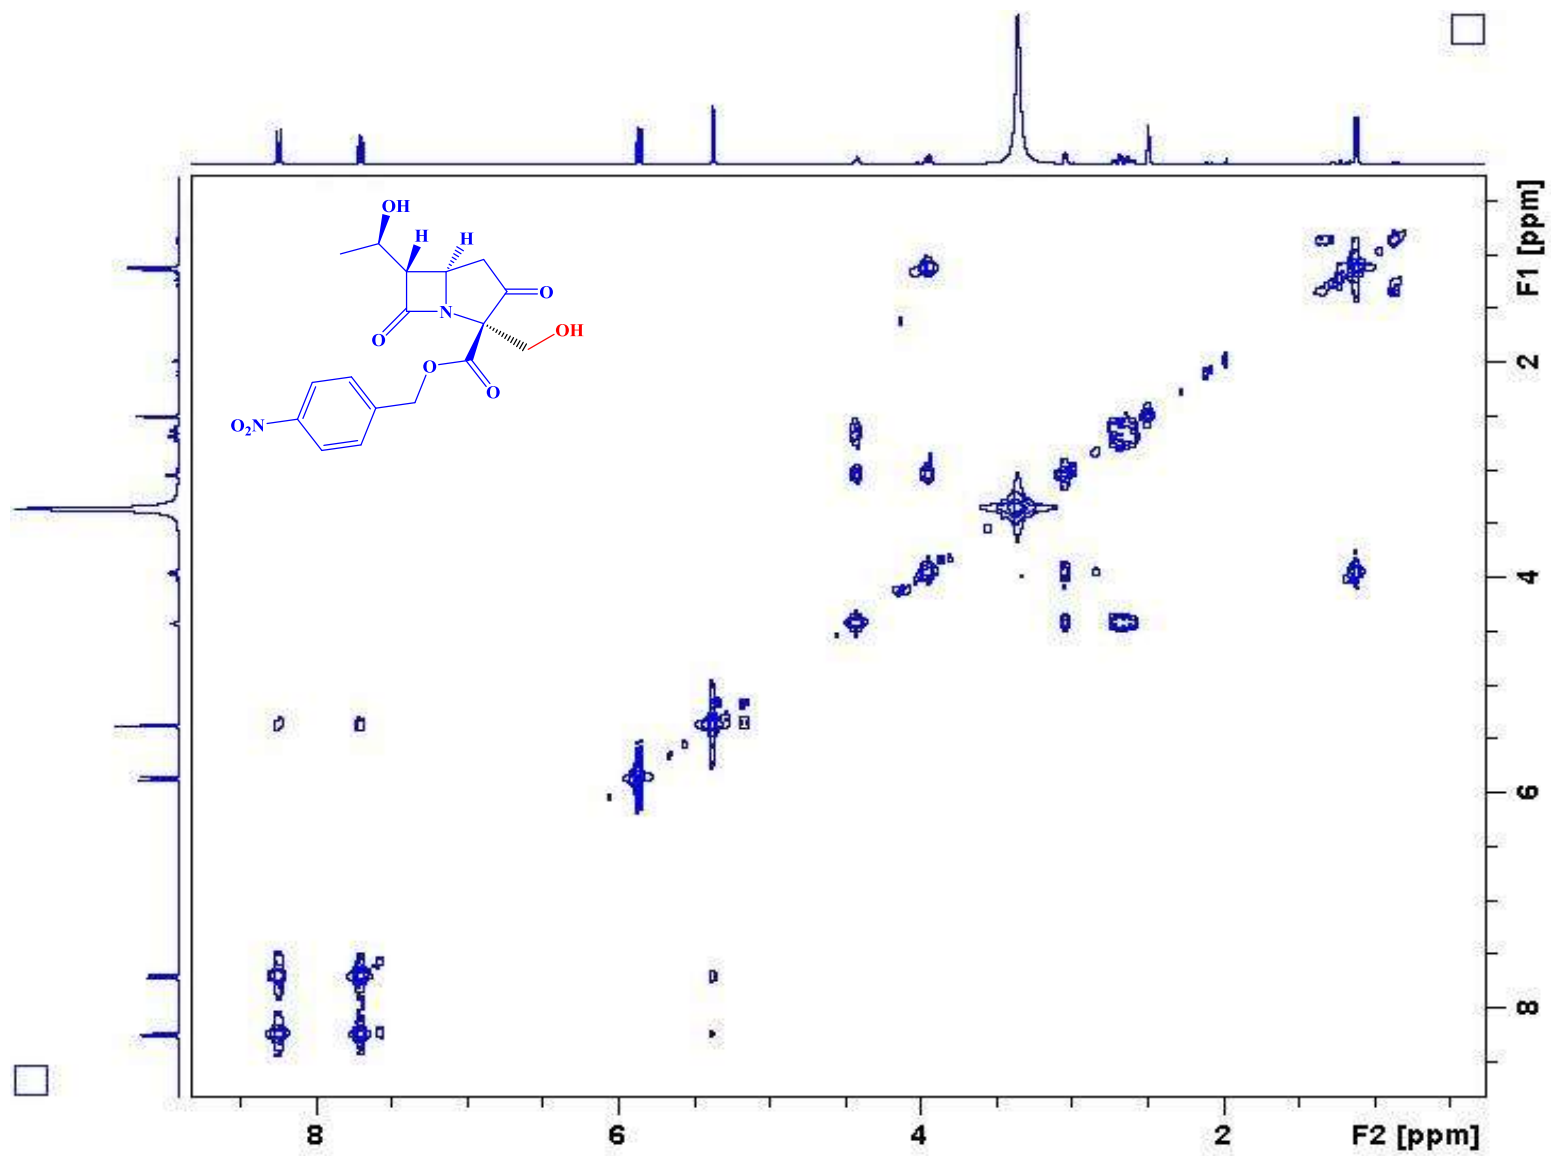

NOESY of ((2*S*)-4-nitrobenzyl-6-((*R*)-1-hydroxyethyl)-2-(hydroxymethyl)-3,7-dioxo-1-azabicyclo[3.2.0]heptane-2-carboxylate

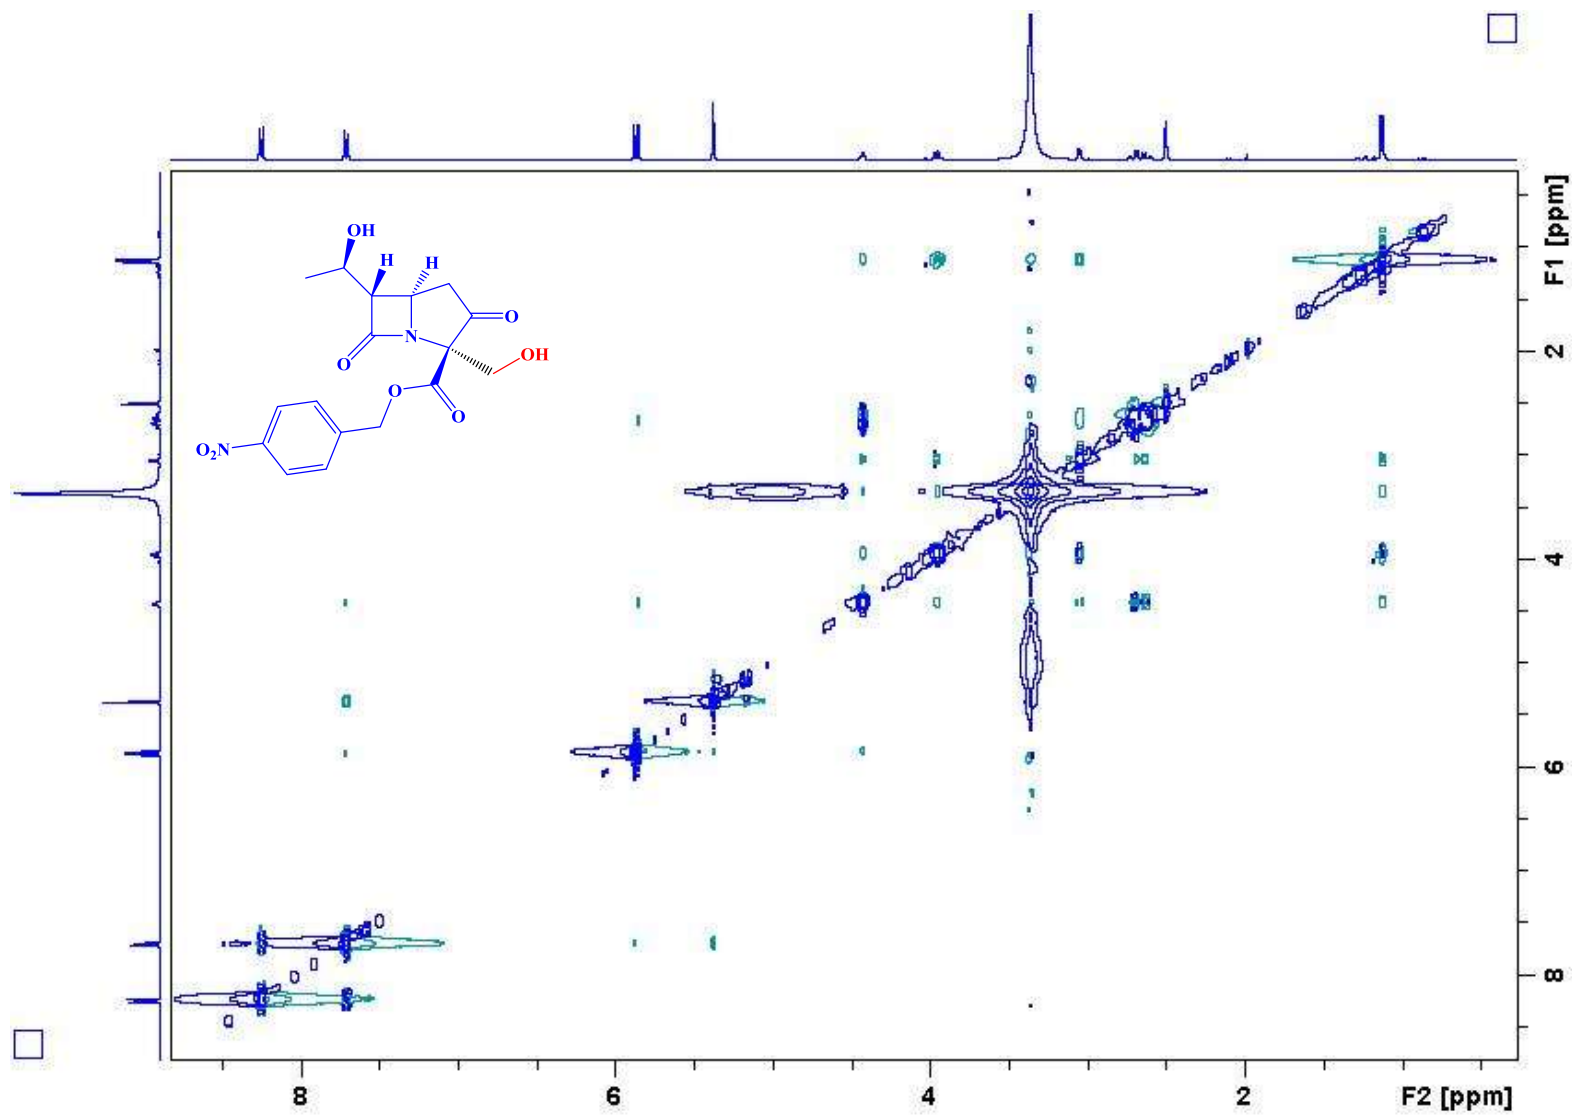

HSQC of ((2*S*)-4-nitrobenzyl-6-((*R*)-1-hydroxyethyl)-2-(hydroxymethyl)-3,7-dioxo-1-azabicyclo[3.2.0]heptane-2-carboxylate

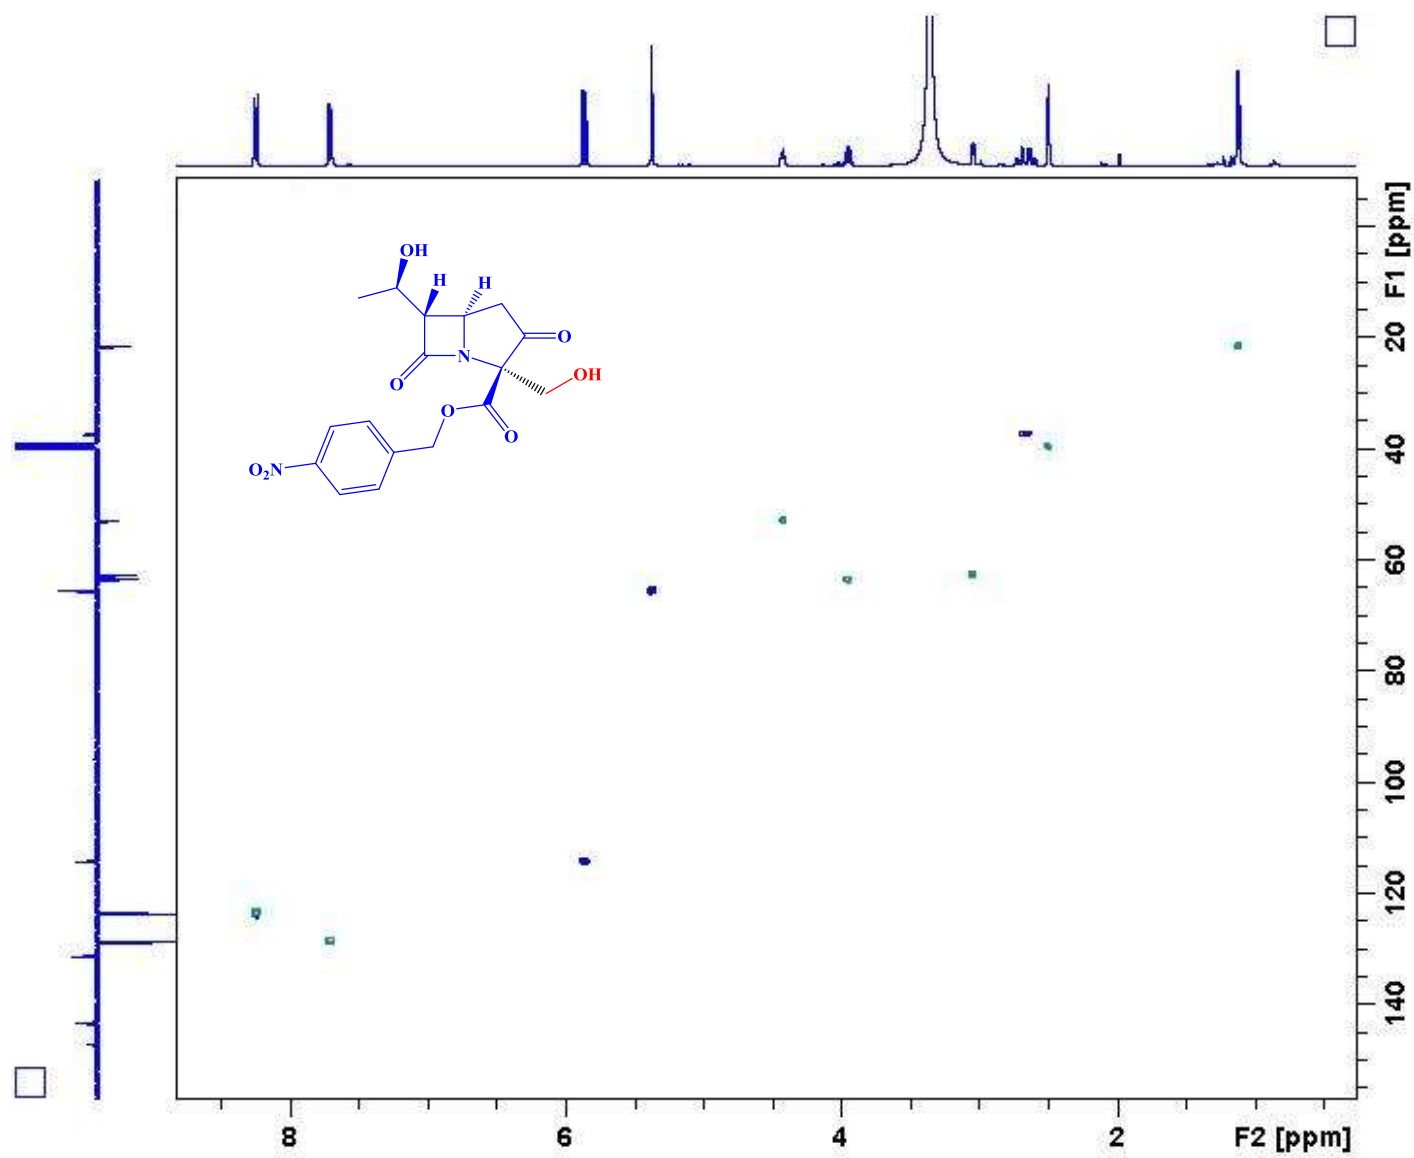

HMBC of ((2*S*)-4-nitrobenzyl-6-((*R*)-1-hydroxyethyl)-2-(hydroxymethyl)-3,7-dioxo-1-azabicyclo[3.2.0]heptane-2-carboxylate

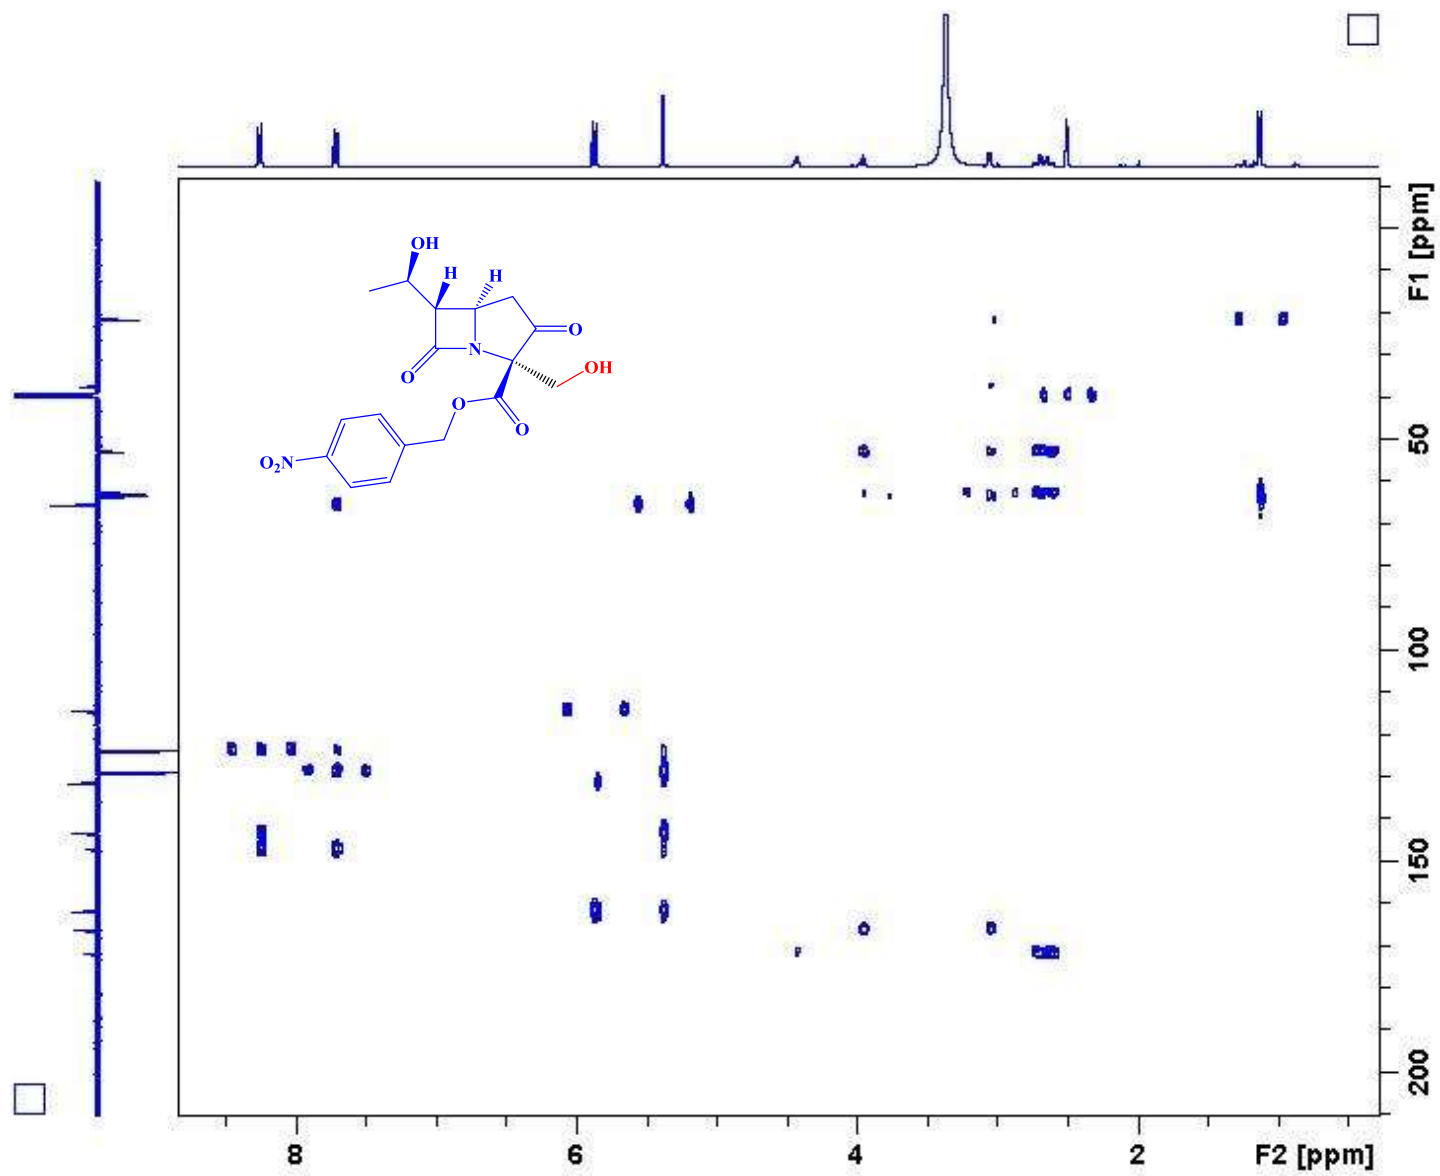

**<sup>1</sup>H-NMR spectra of (2S)-nitrobenzyl2-((R)-hydroxy(phenyl)methyl)-6-(1-hydroxyethyl)-3,7-dioxo-1-azabicyclo[3.2.0]heptane-2-carboxylate**

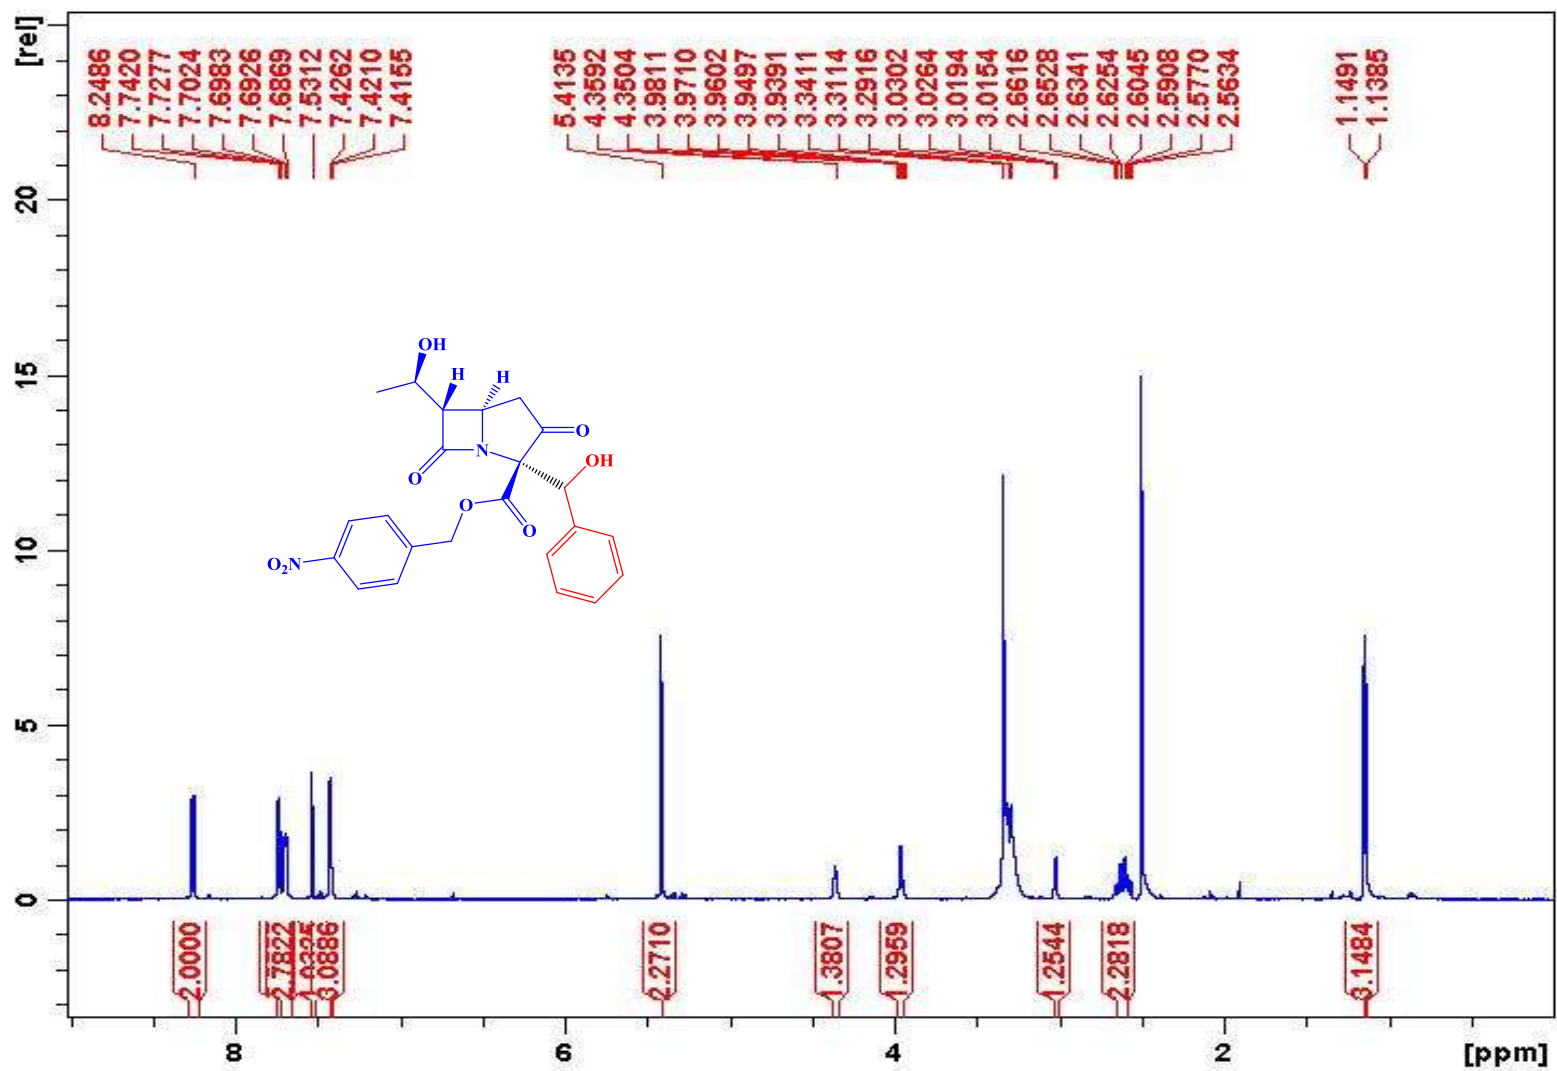

<sup>13</sup>C-NMR spectra of (2*S*)-nitrobenzyl-2-((*R*)-hydroxy(phenyl)methyl)-6-(1-hydroxyethyl)-3,7-dioxo-1-azabicyclo[3.2.0]heptane-2-carboxylate

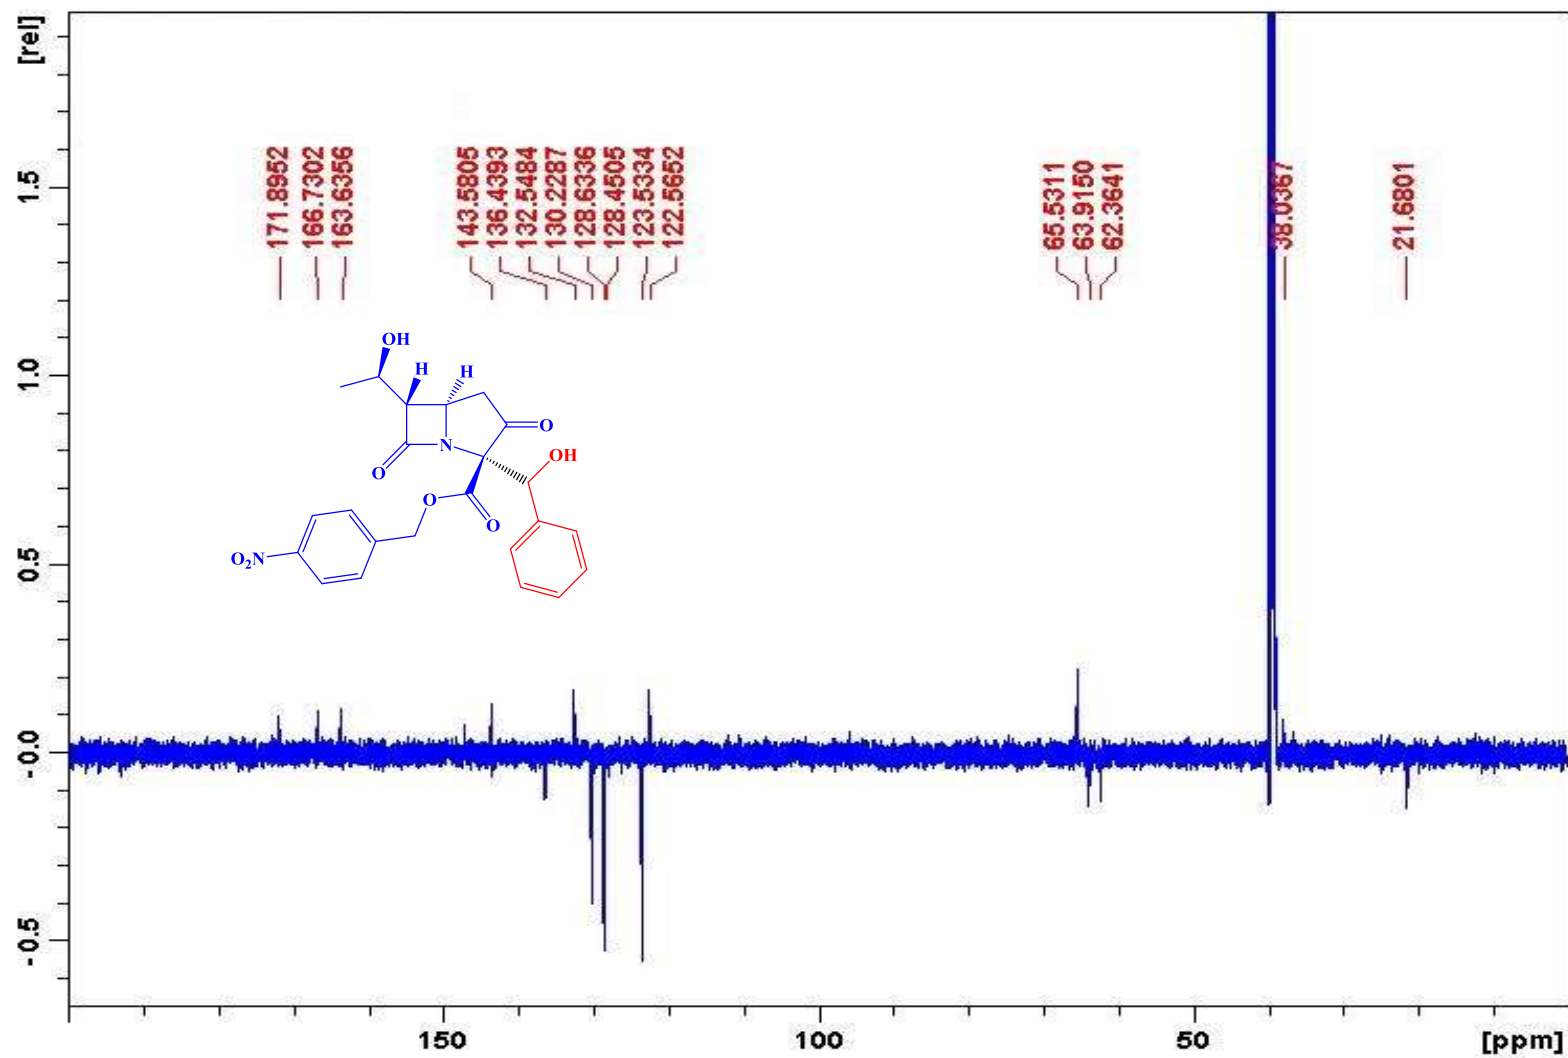

Crude  $^1\text{H-NMR}$  spectra of (2S)-nitrobenzyl-2-((R)-hydroxy(phenyl)methyl)-6-(1-hydroxyethyl)-3,7-dioxo-1-azabicyclo[3.2.0]heptane-2-carboxylate

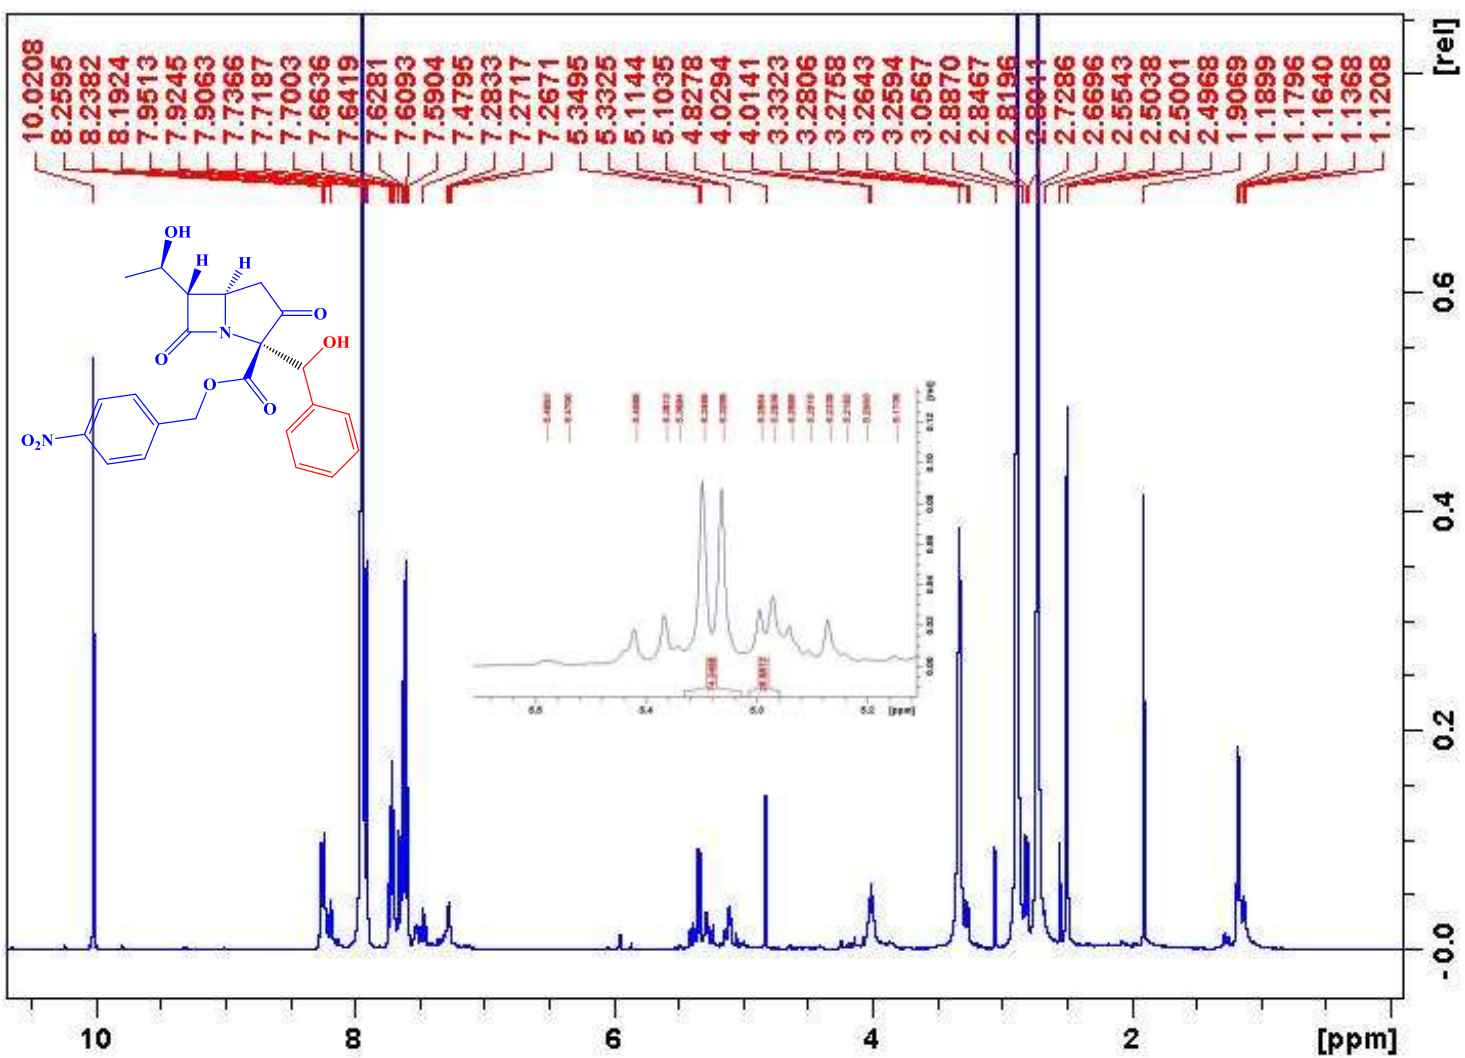

Crude  $^1\text{H-NMR}$  spectra of (2S)-nitrobenzyl2-((R)-hydroxy(phenyl)methyl)-6-(1-hydroxyethyl)-3,7-dioxo-1-azabicyclo[3.2.0]heptane-2-carboxylate

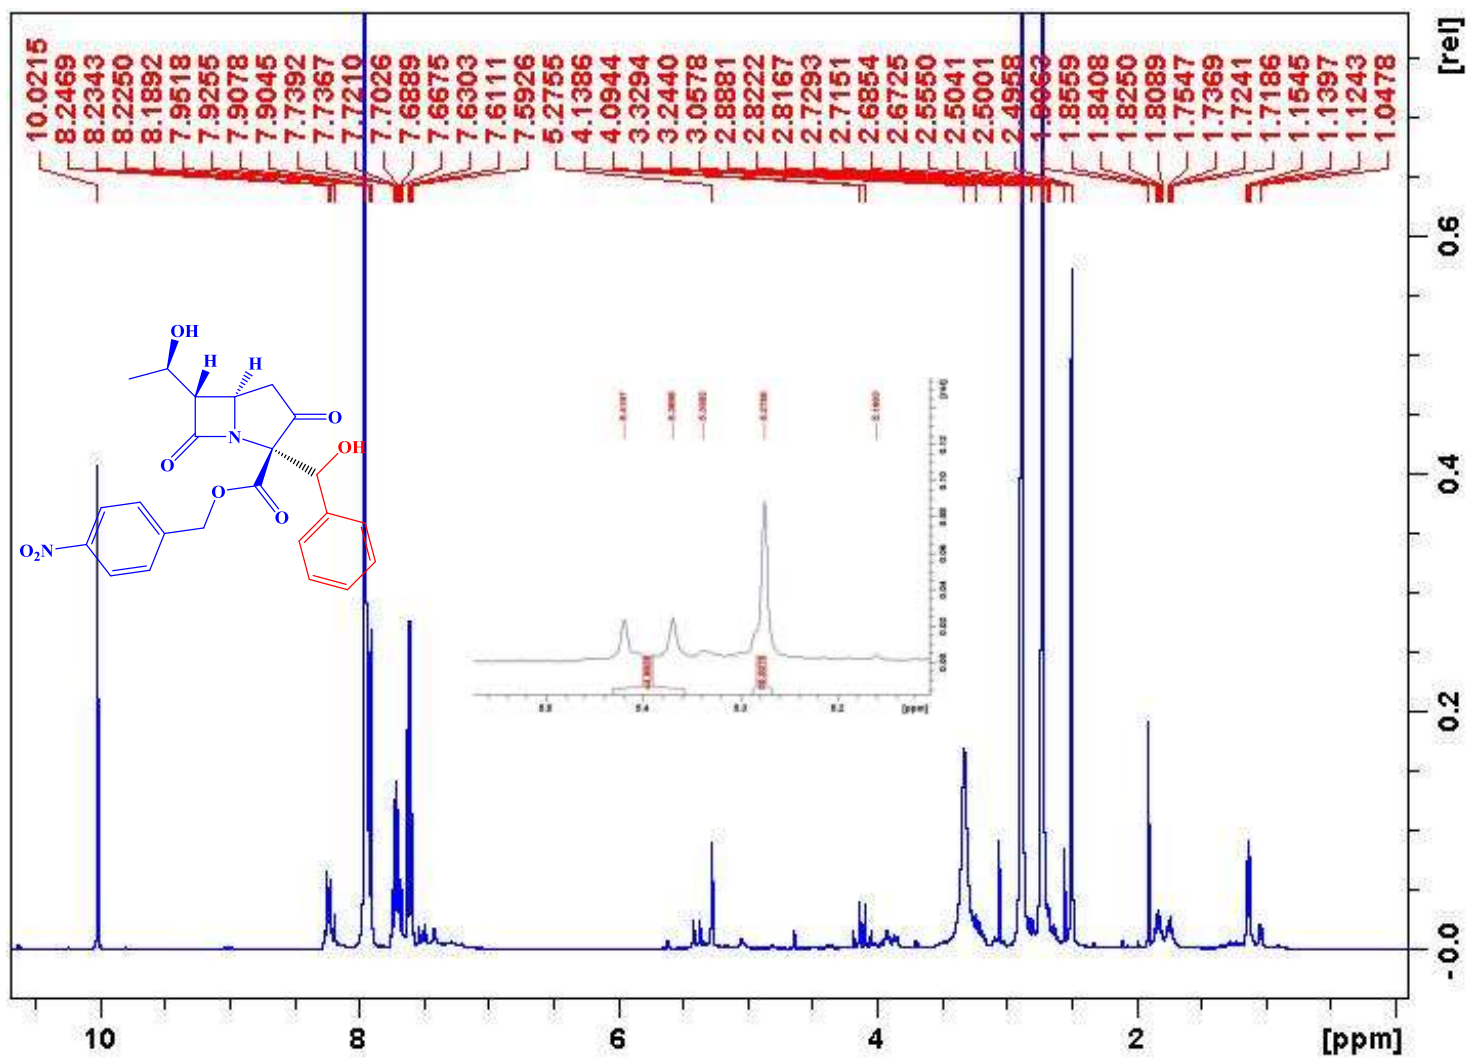



Crude  $^1\text{H-NMR}$  spectra of 4-nitrobenzyl (2*S*,5*R*,6*S*)-2-((*S*)-hydroxy(4-nitrophenyl)methyl)-6-((*R*)-1-hydroxyethyl)-3,7-dioxo-1-azabicyclo[3.2.0]heptane-2-carboxylate

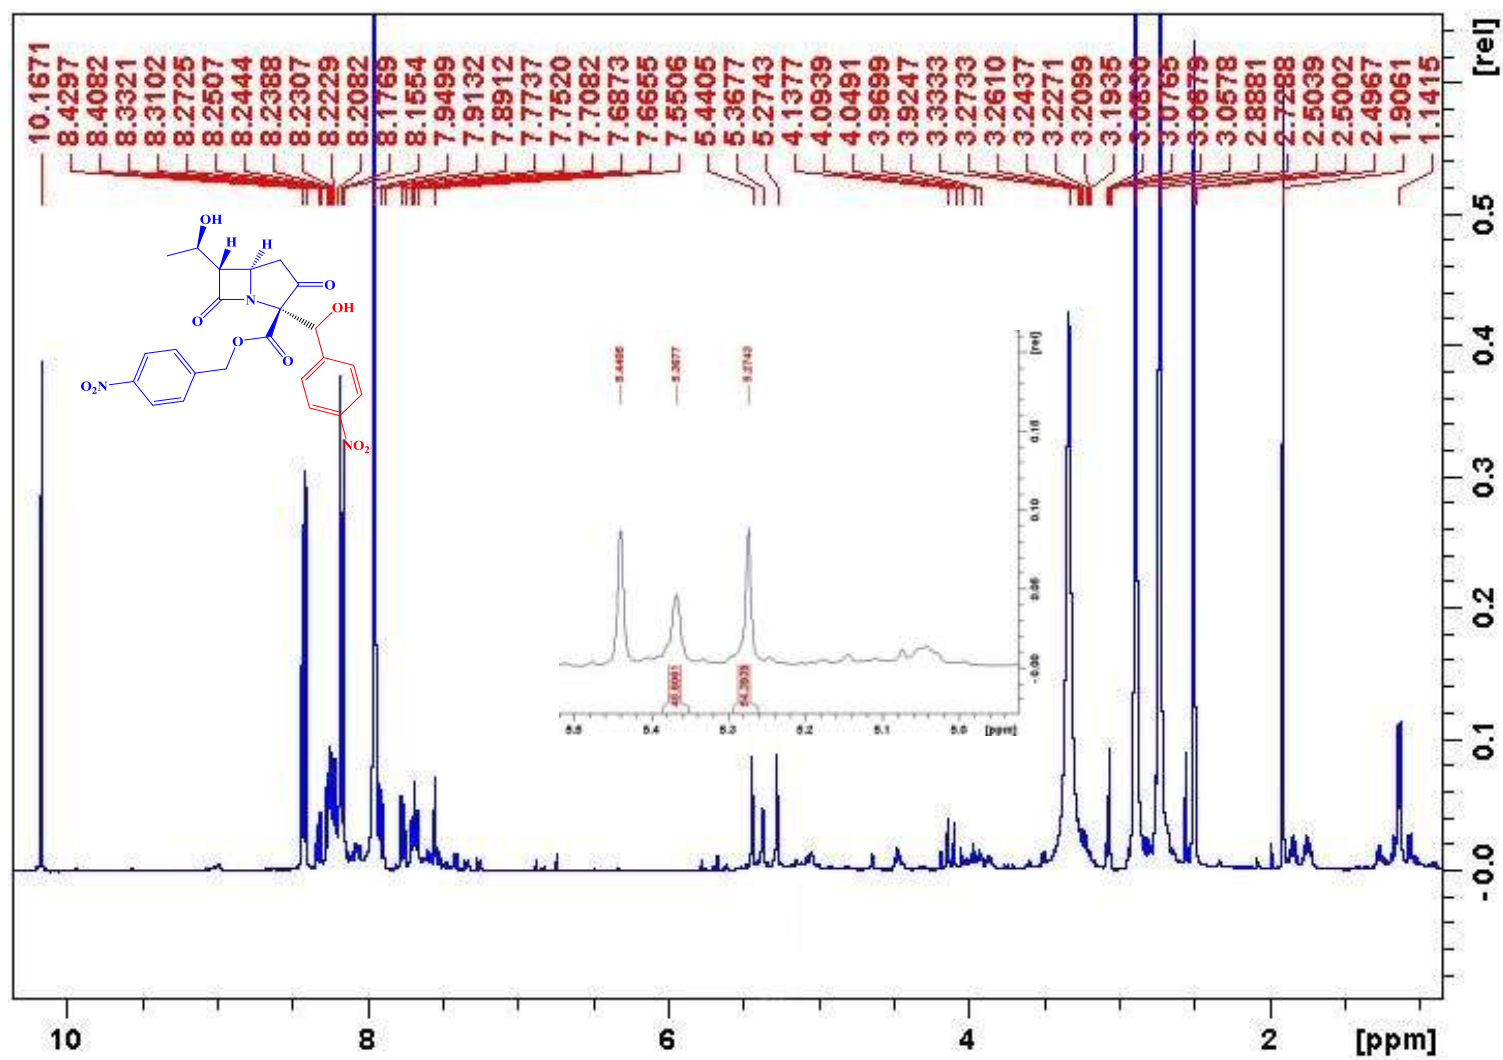

Crude  $^1\text{H-NMR}$  spectra of 4-nitrobenzyl (2*S*,5*R*,6*S*)-2-((*S*)-hydroxy(*p*-tolyl)methyl)-6-((*R*)-1-hydroxyethyl)-3,7-dioxo-1-azabicyclo[3.2.0]heptane-2-carboxylate

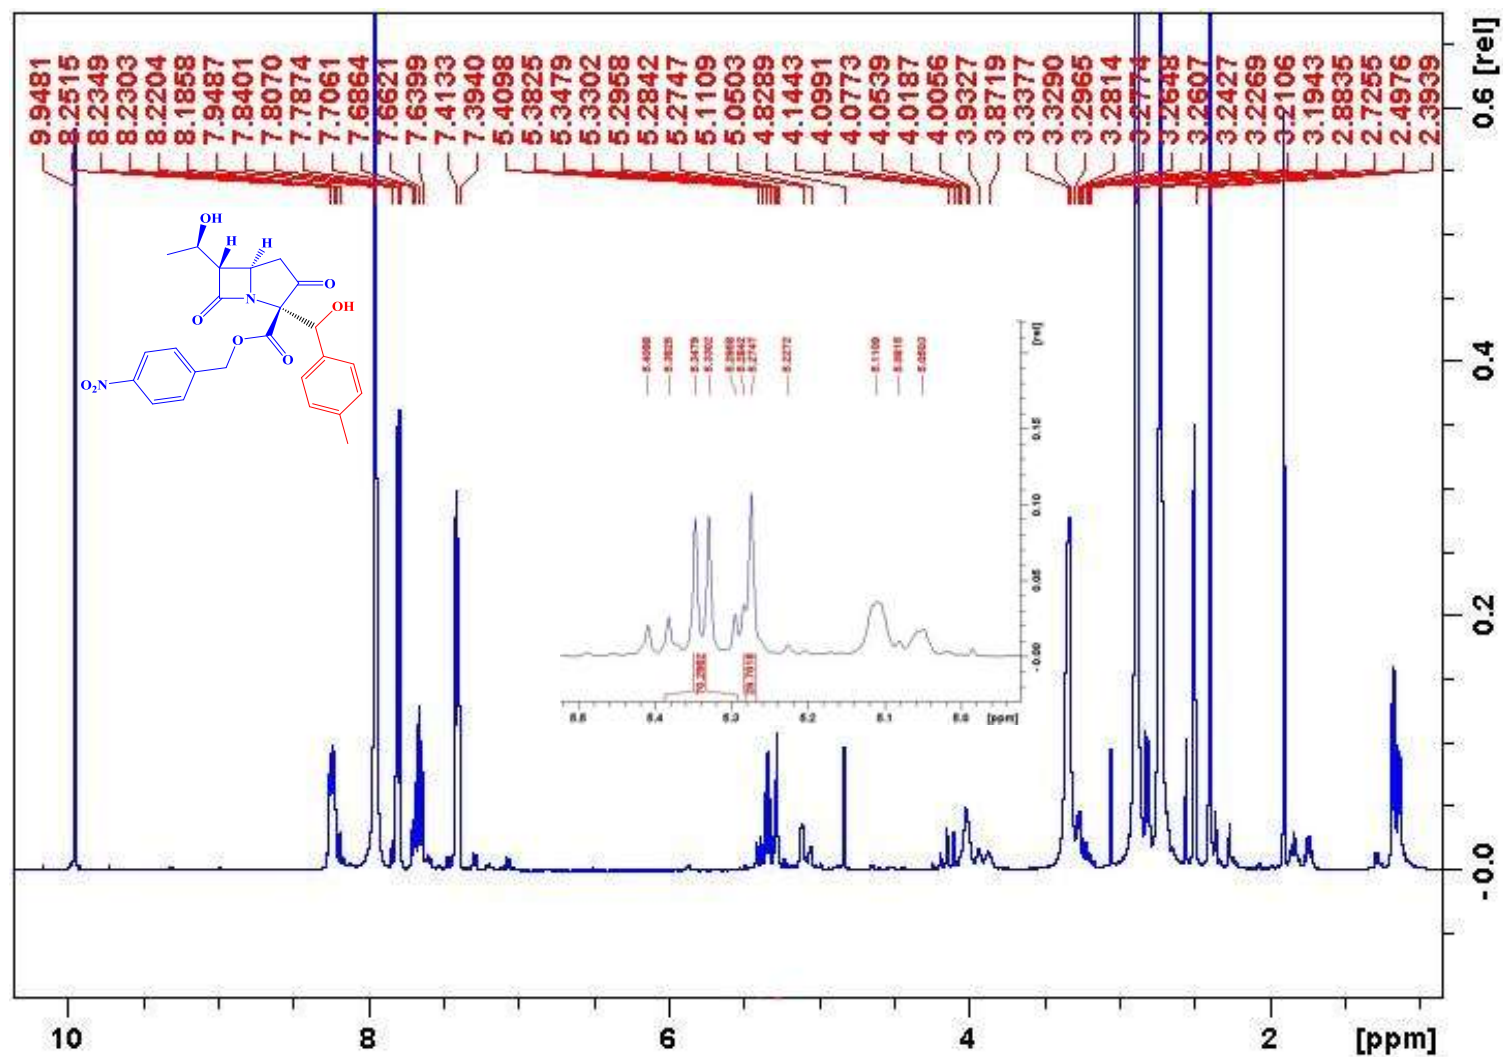

Crude <sup>1</sup>H-NMR spectra of 4-nitrobenzyl (2*S*,5*R*,6*S*)-2-((*S*)-(4-fluorophenyl)(hydroxy)methyl)-6-((*R*)-1-hydroxyethyl)-3,7-dioxo-1-azabicyclo[3.2.0]heptane-2-carboxylate

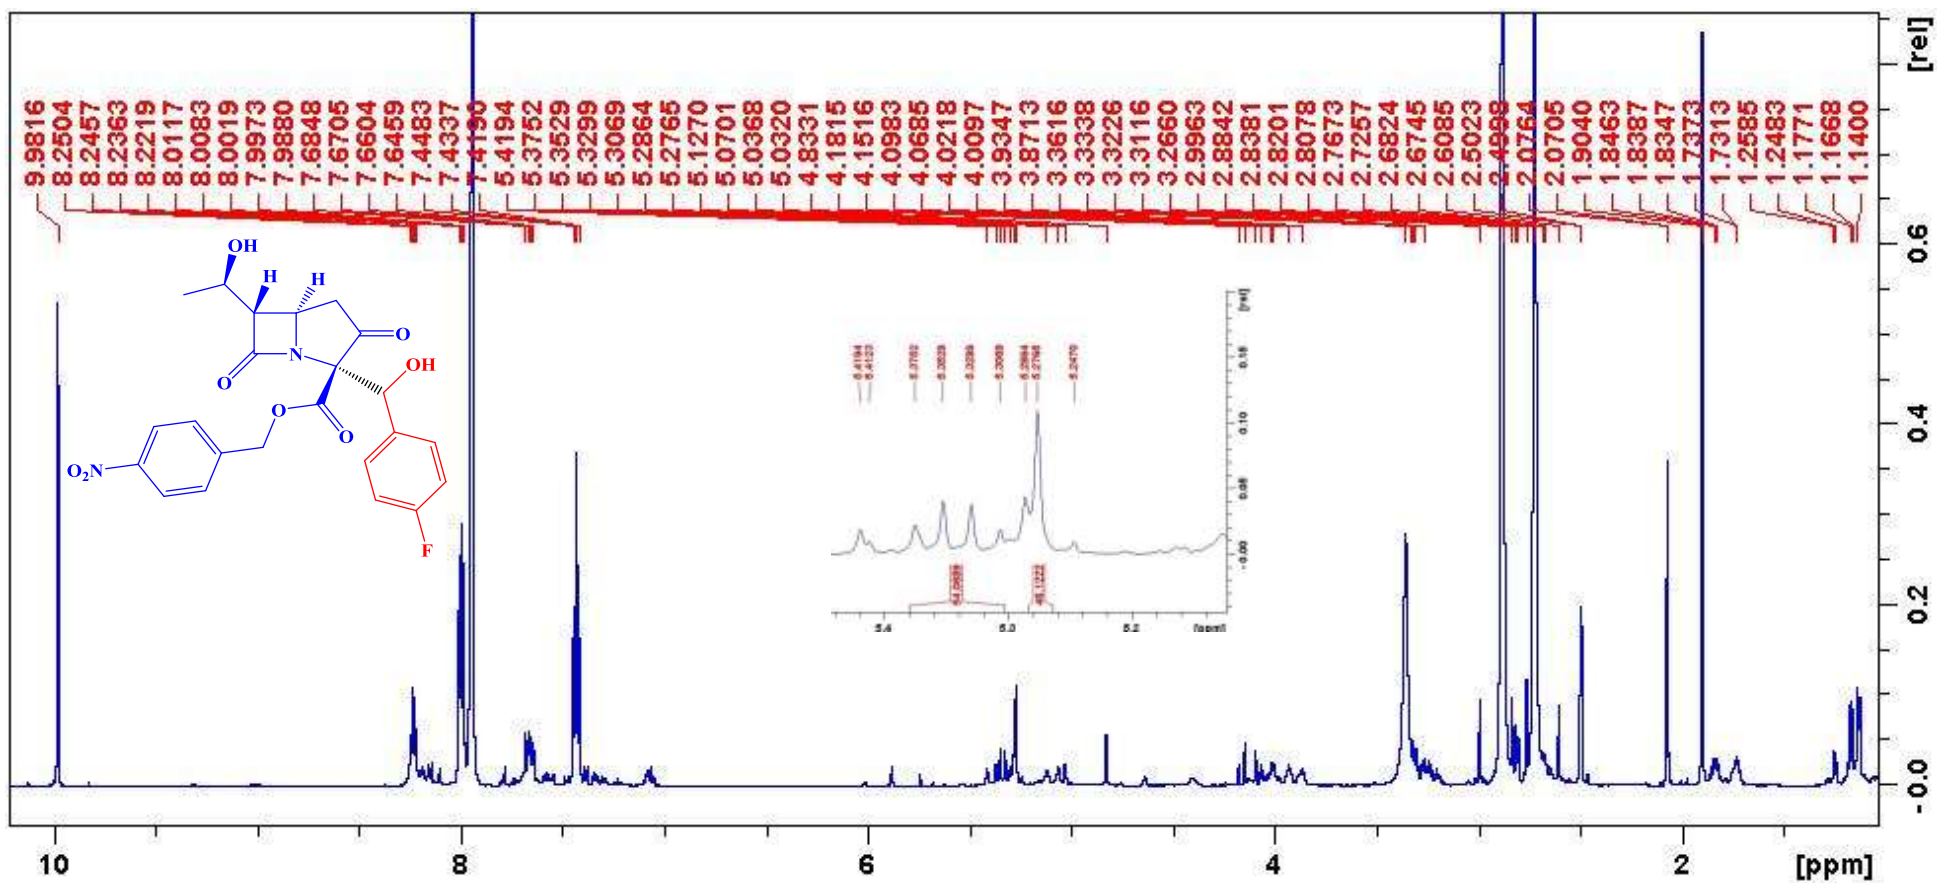

Crude  $^1\text{H-NMR}$  spectra of 4-nitrobenzyl (2*S*,5*R*,6*S*)-2-((*S*)-hydroxy(4-methoxyphenyl)methyl)-6-((*R*)-1-hydroxyethyl)-3,7-dioxo-1-azabicyclo[3.2.0]heptane-2-carboxylate

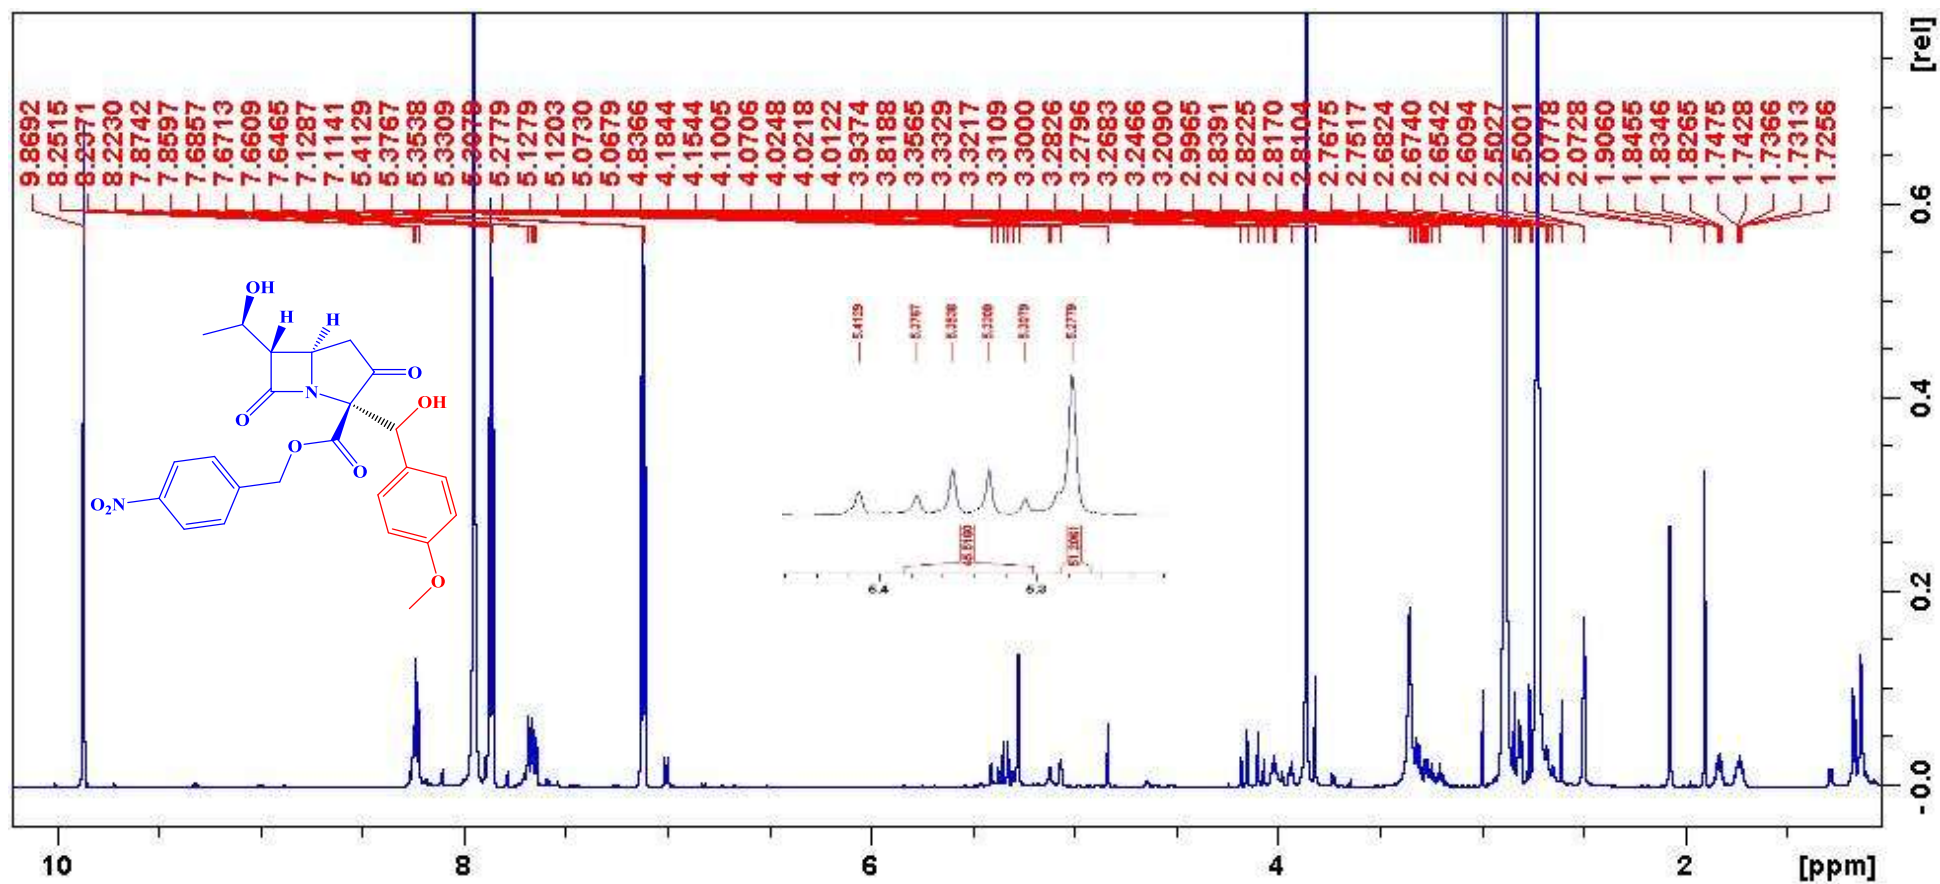

Crude  $^1\text{H-NMR}$  spectra of 4-nitrobenzyl (2*S*,5*R*,6*S*)-2-((*S*)-(2,4-dimethoxyphenyl)(hydroxy)methyl)-6-((*R*)-1-hydroxyethyl)-3,7-dioxo-1-azabicyclo[3.2.0]heptane-2-carboxylate

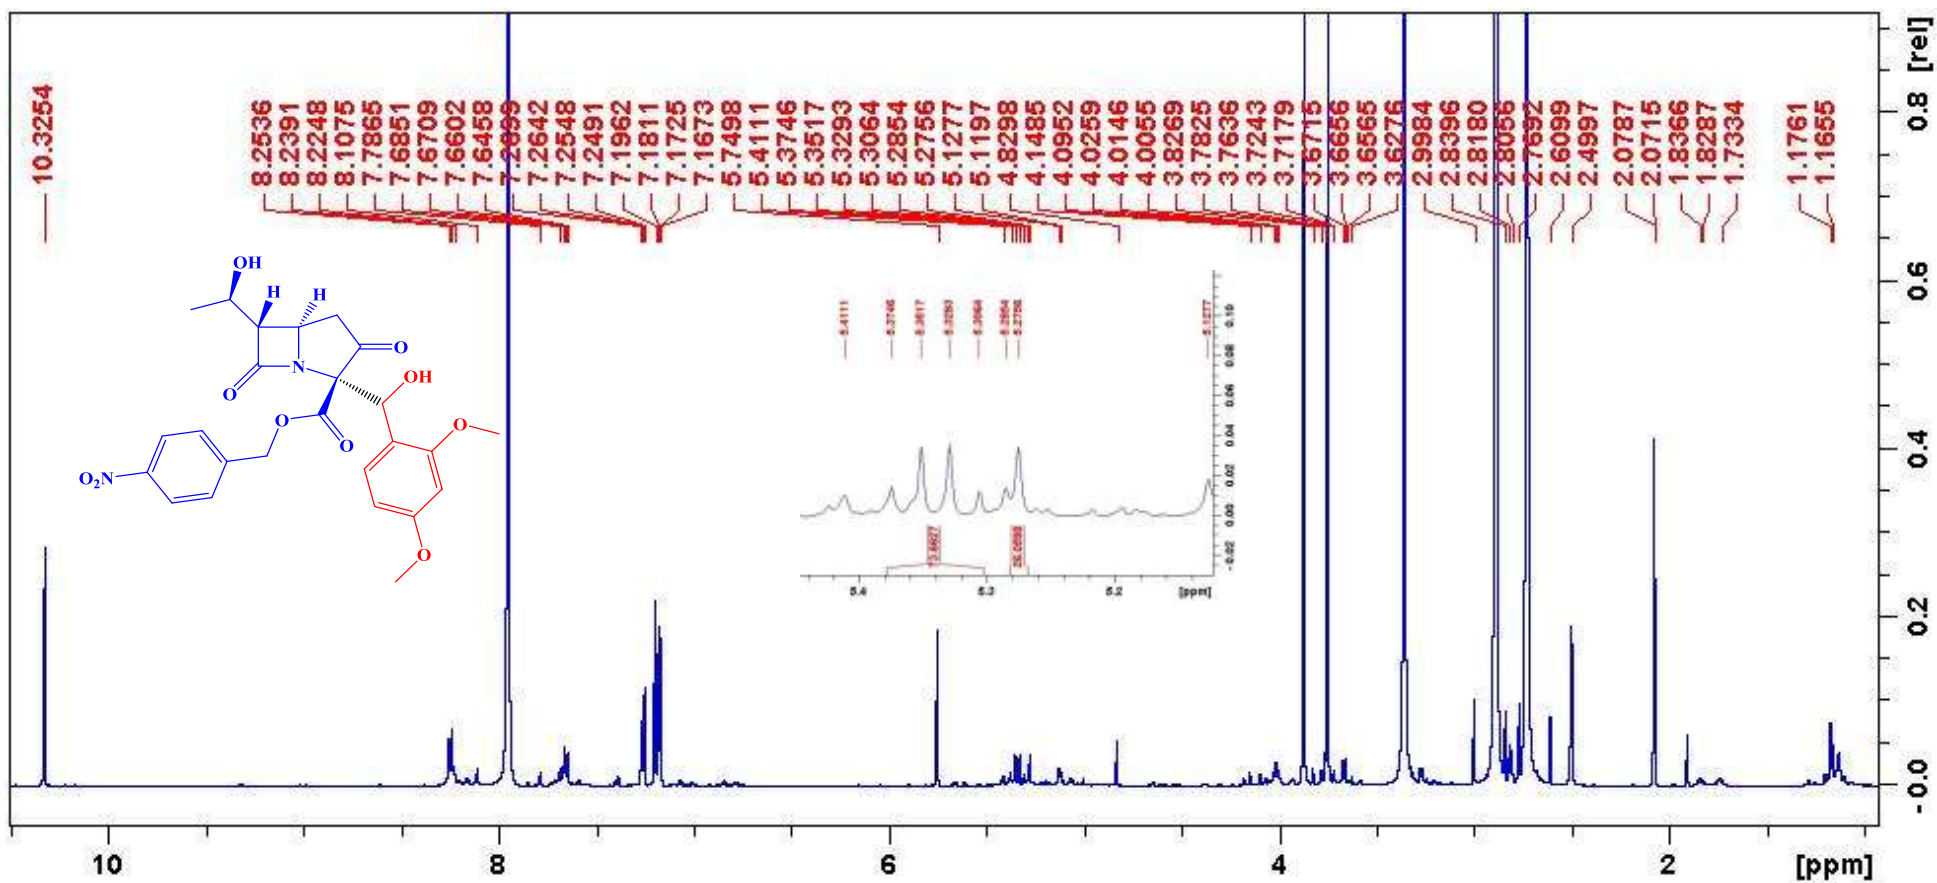

Crude  $^1\text{H-NMR}$  spectra of 4-nitrobenzyl (2*S*,5*R*,6*S*)-2-((*S*)-1-hydroxybutyl)-6-((*R*)-1-hydroxyethyl)-3,7-dioxo-1-azabicyclo[3.2.0]heptane-2-carboxylate

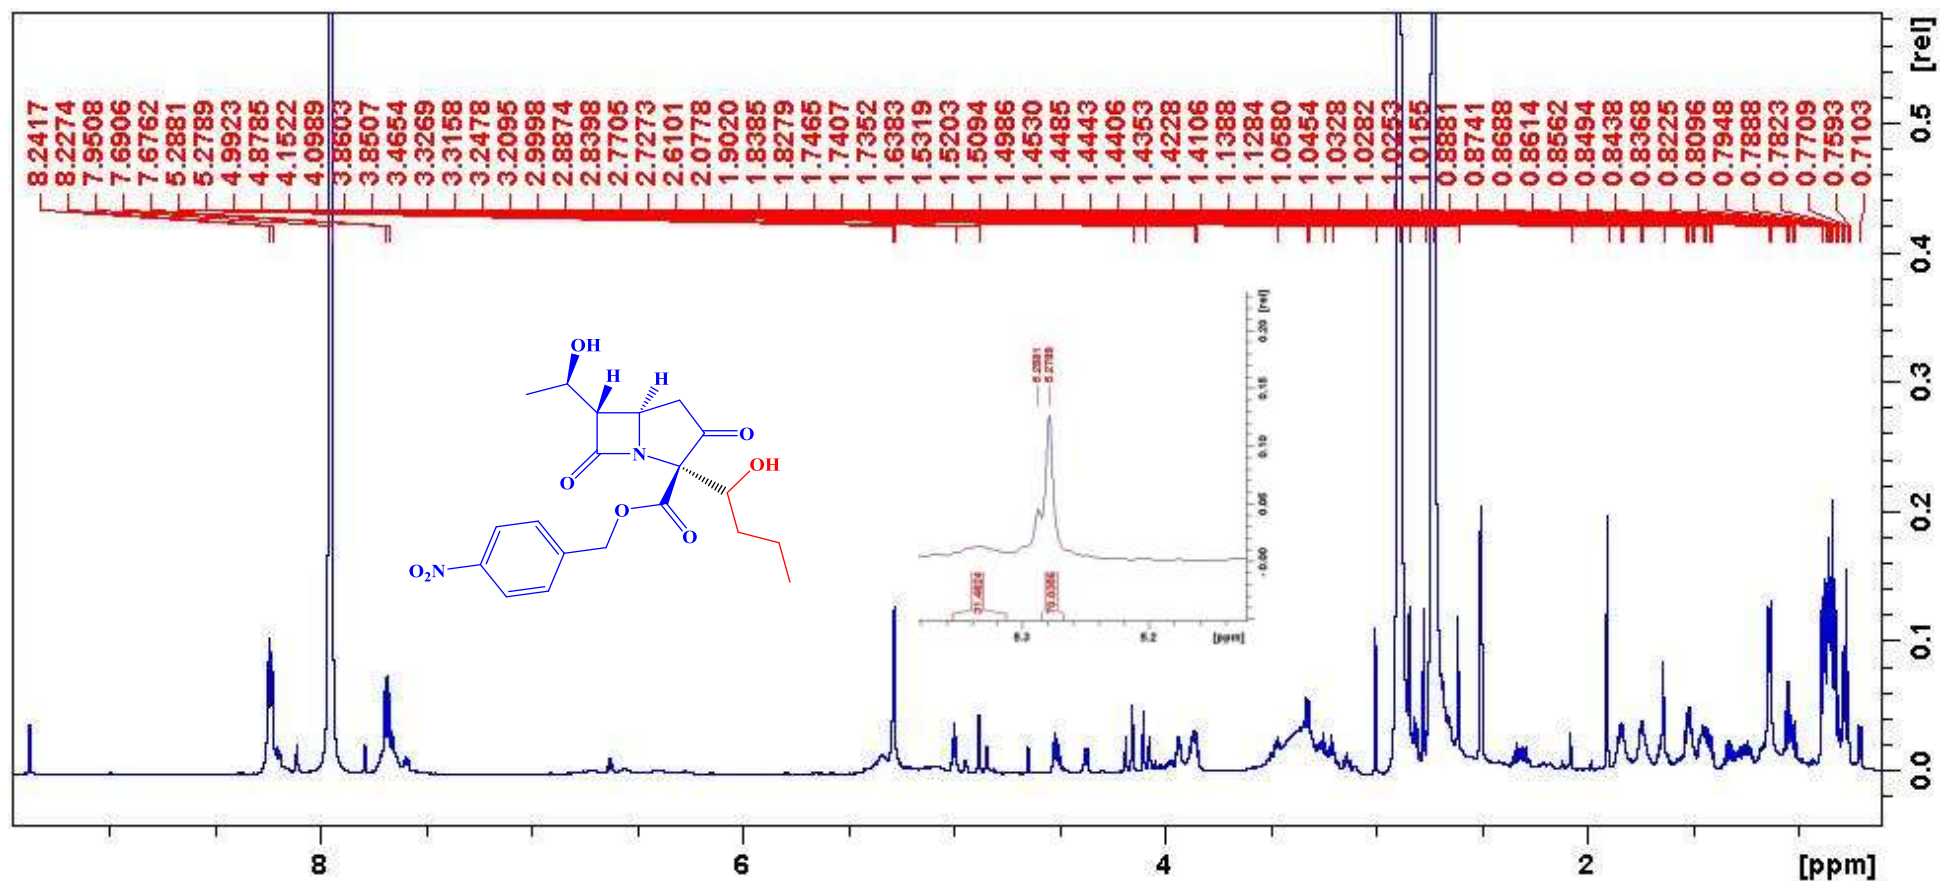

<sup>1</sup>H-NMR spectra of (2*S*,5*R*,6*S*)-4-nitrobenzyl 6-((*R*)-1-hydroxyethyl)-3,7-dioxo-2-((phenylamino)methyl)-1-azabicyclo[3.2.0]heptane-2-carboxylate

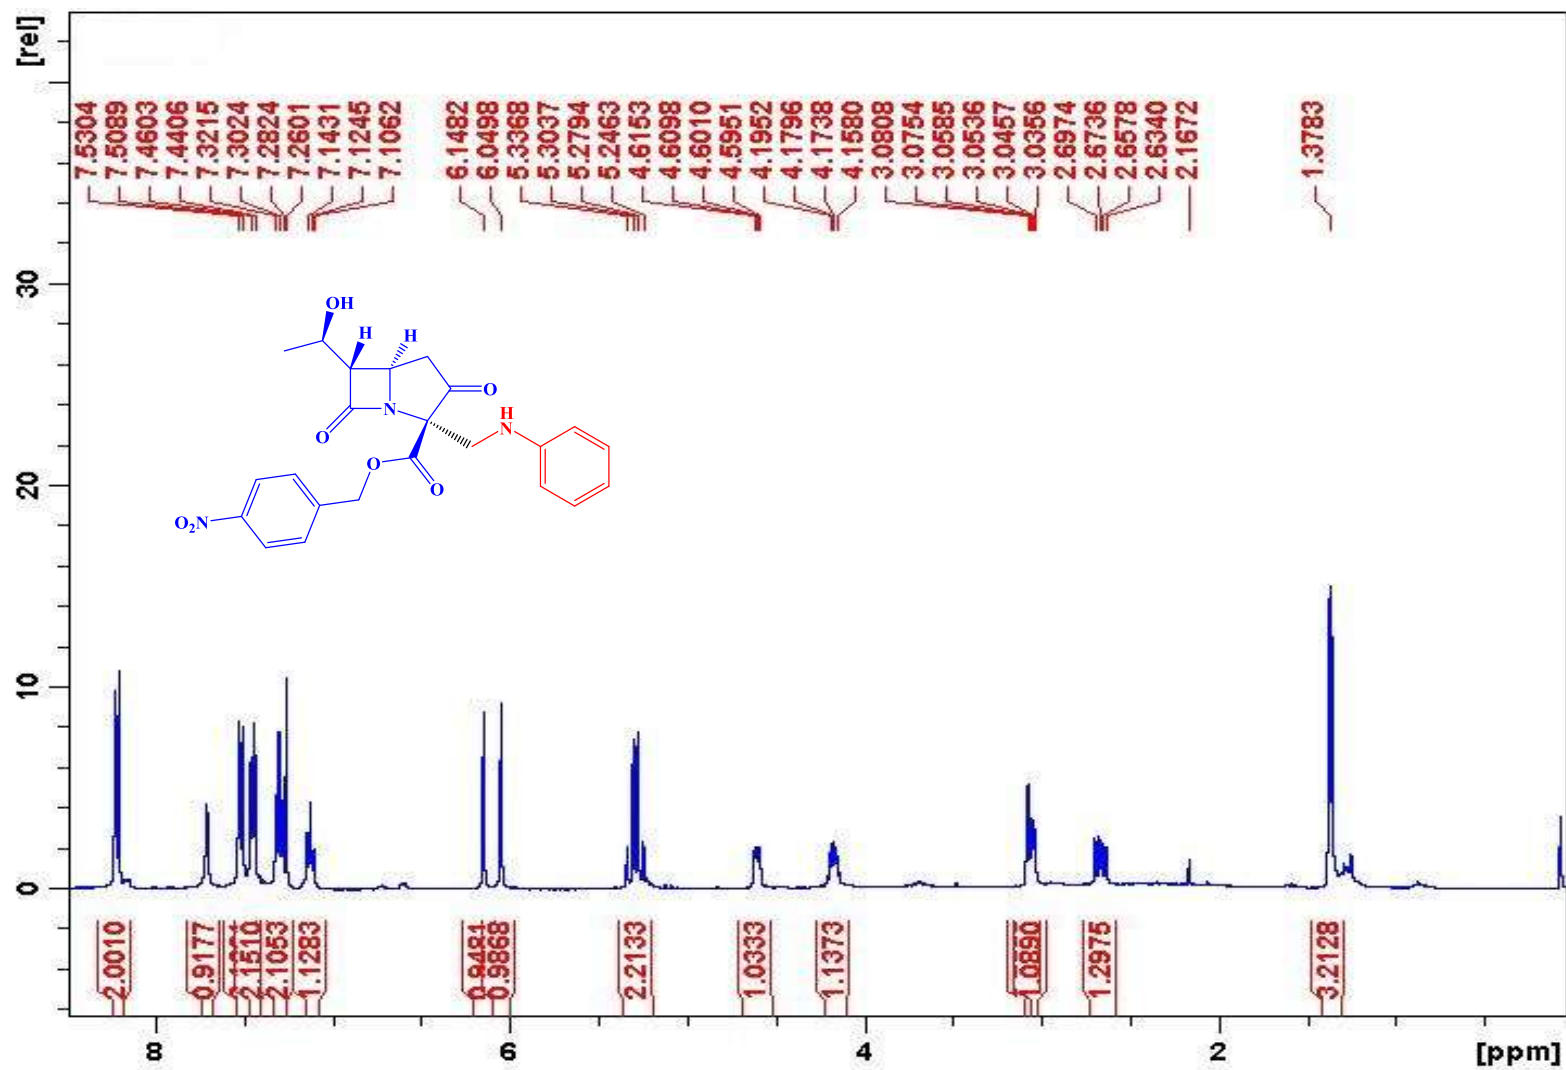

$^{13}\text{C}$ -NMR spectra of (2*S*,5*R*,6*S*)-4-nitrobenzyl 6-((*R*)-1-hydroxyethyl)-3,7-dioxo-2-((phenylamino)methyl)-1-azabicyclo[3.2.0]heptane-2-carboxylate

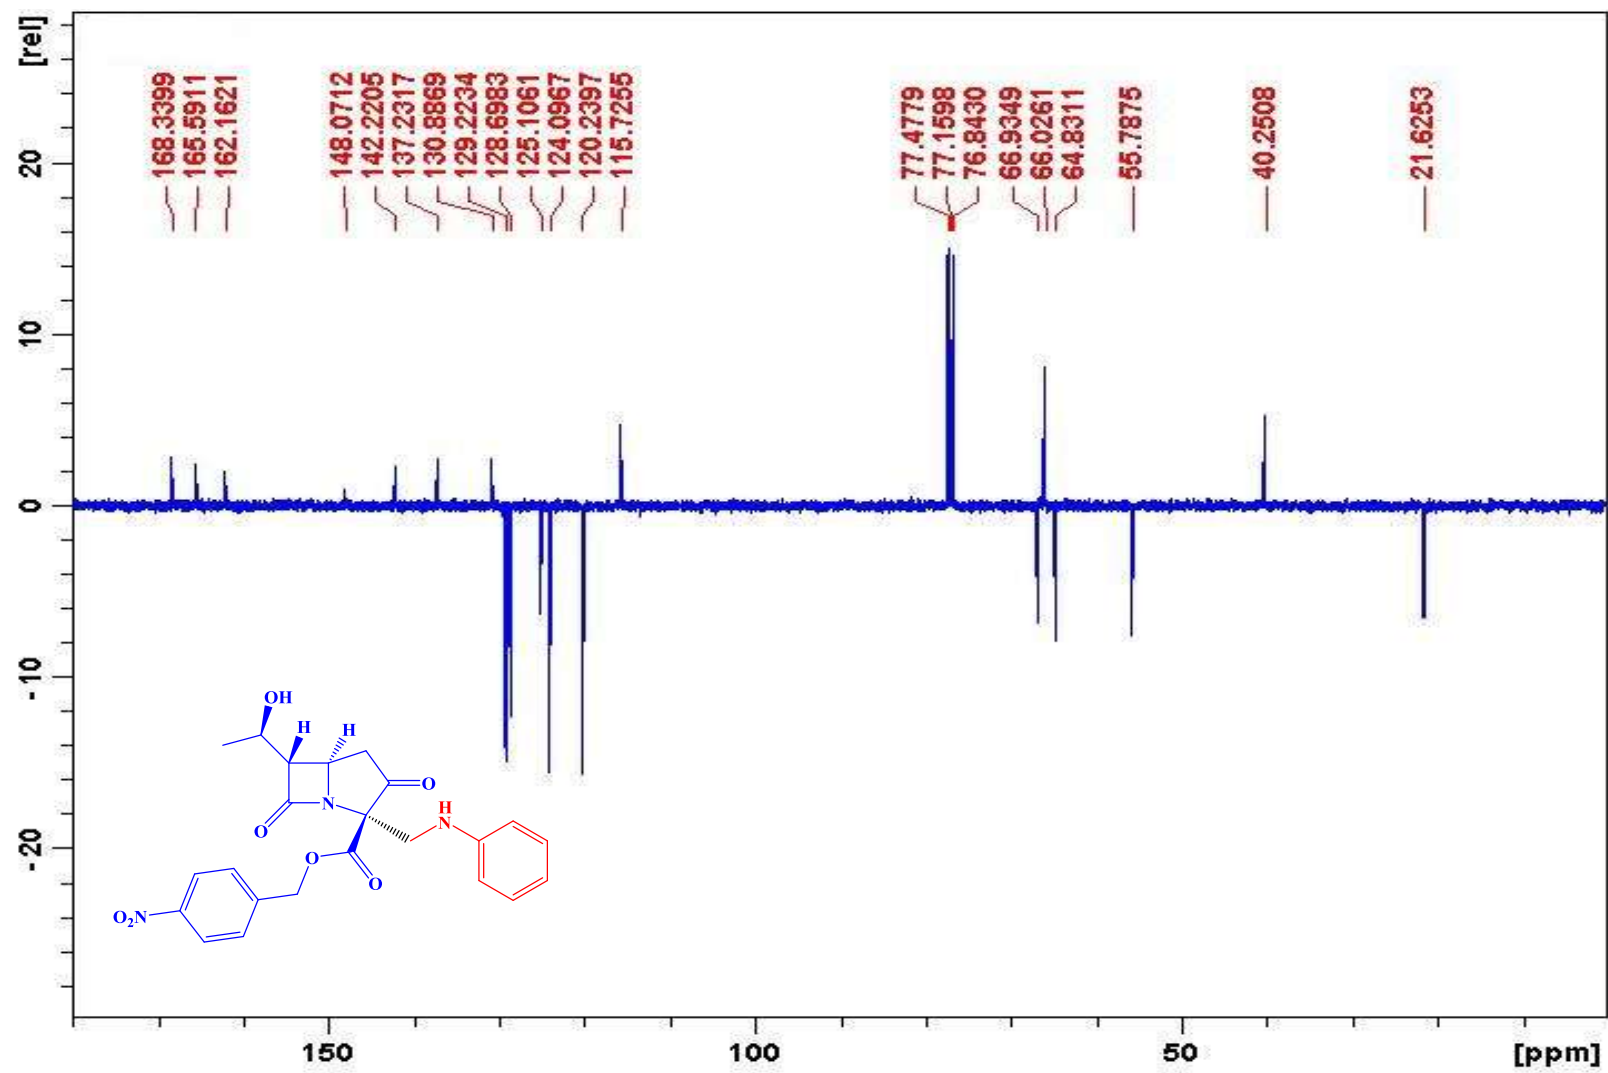



COSY of (2*S*,5*R*,6*S*)-4-nitrobenzyl 6-((*R*)-1-hydroxyethyl)-3,7-dioxo-2-((phenylamino)methyl)-1-azabicyclo[3.2.0]heptane-2-carboxylate

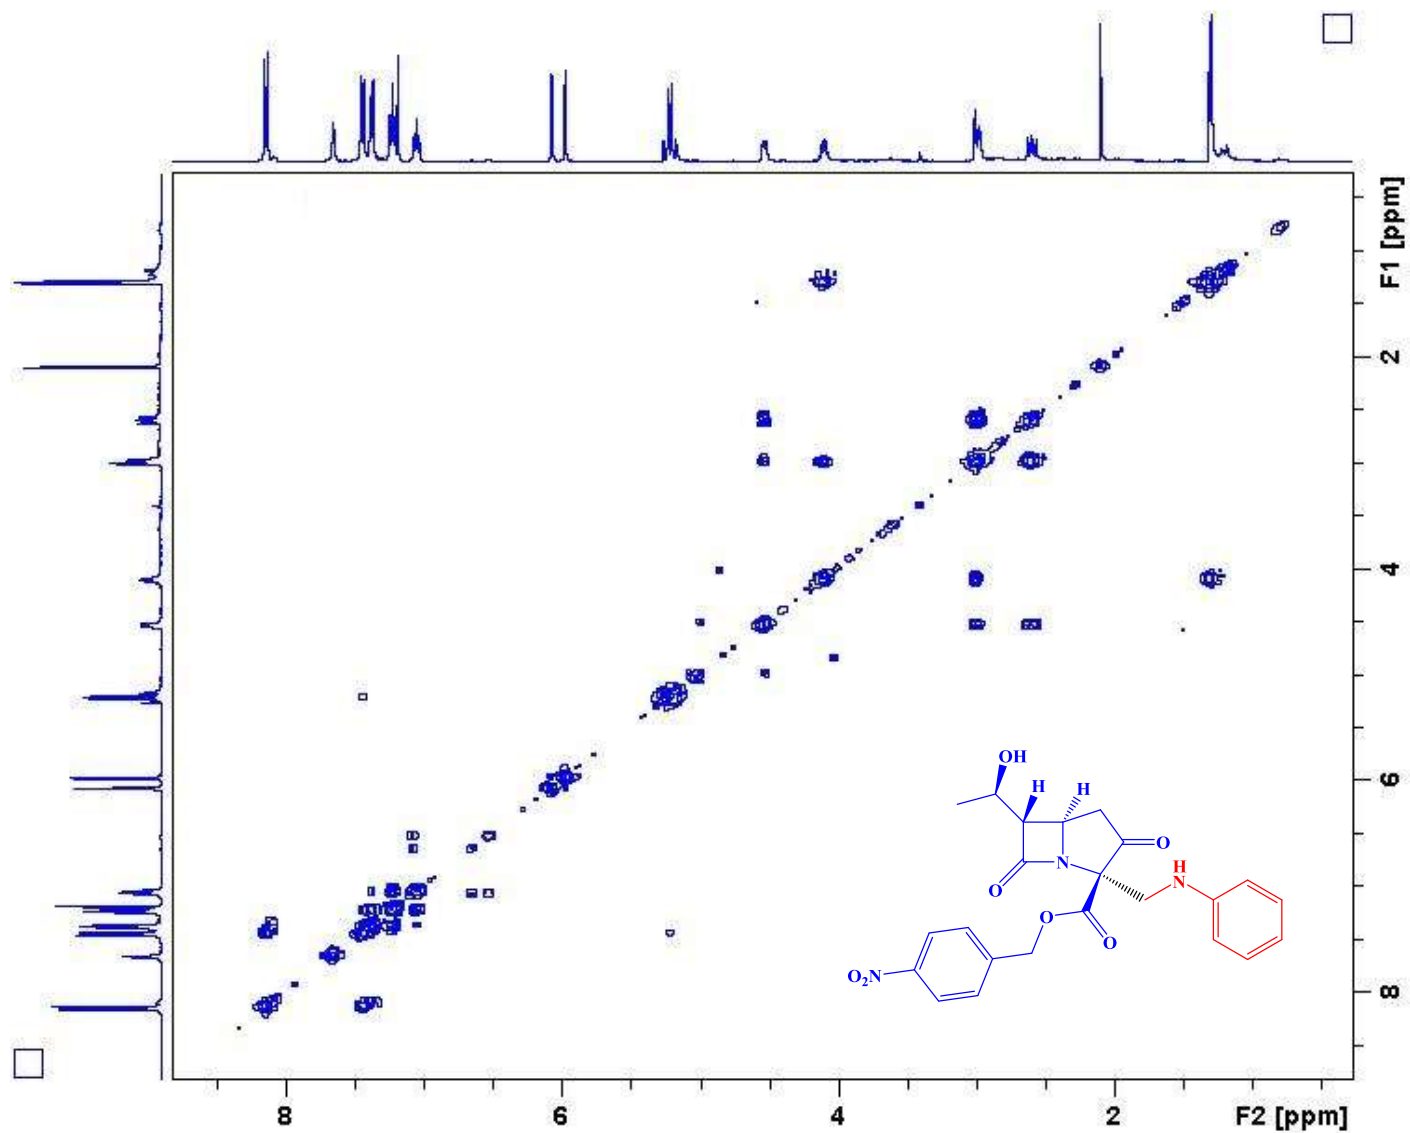

NOESY of (2*S*,5*R*,6*S*)-4-nitrobenzyl 6-((*R*)-1-hydroxyethyl)-3,7-dioxo-2-((phenylamino)methyl)-1-azabicyclo[3.2.0]heptane-2-carboxylate

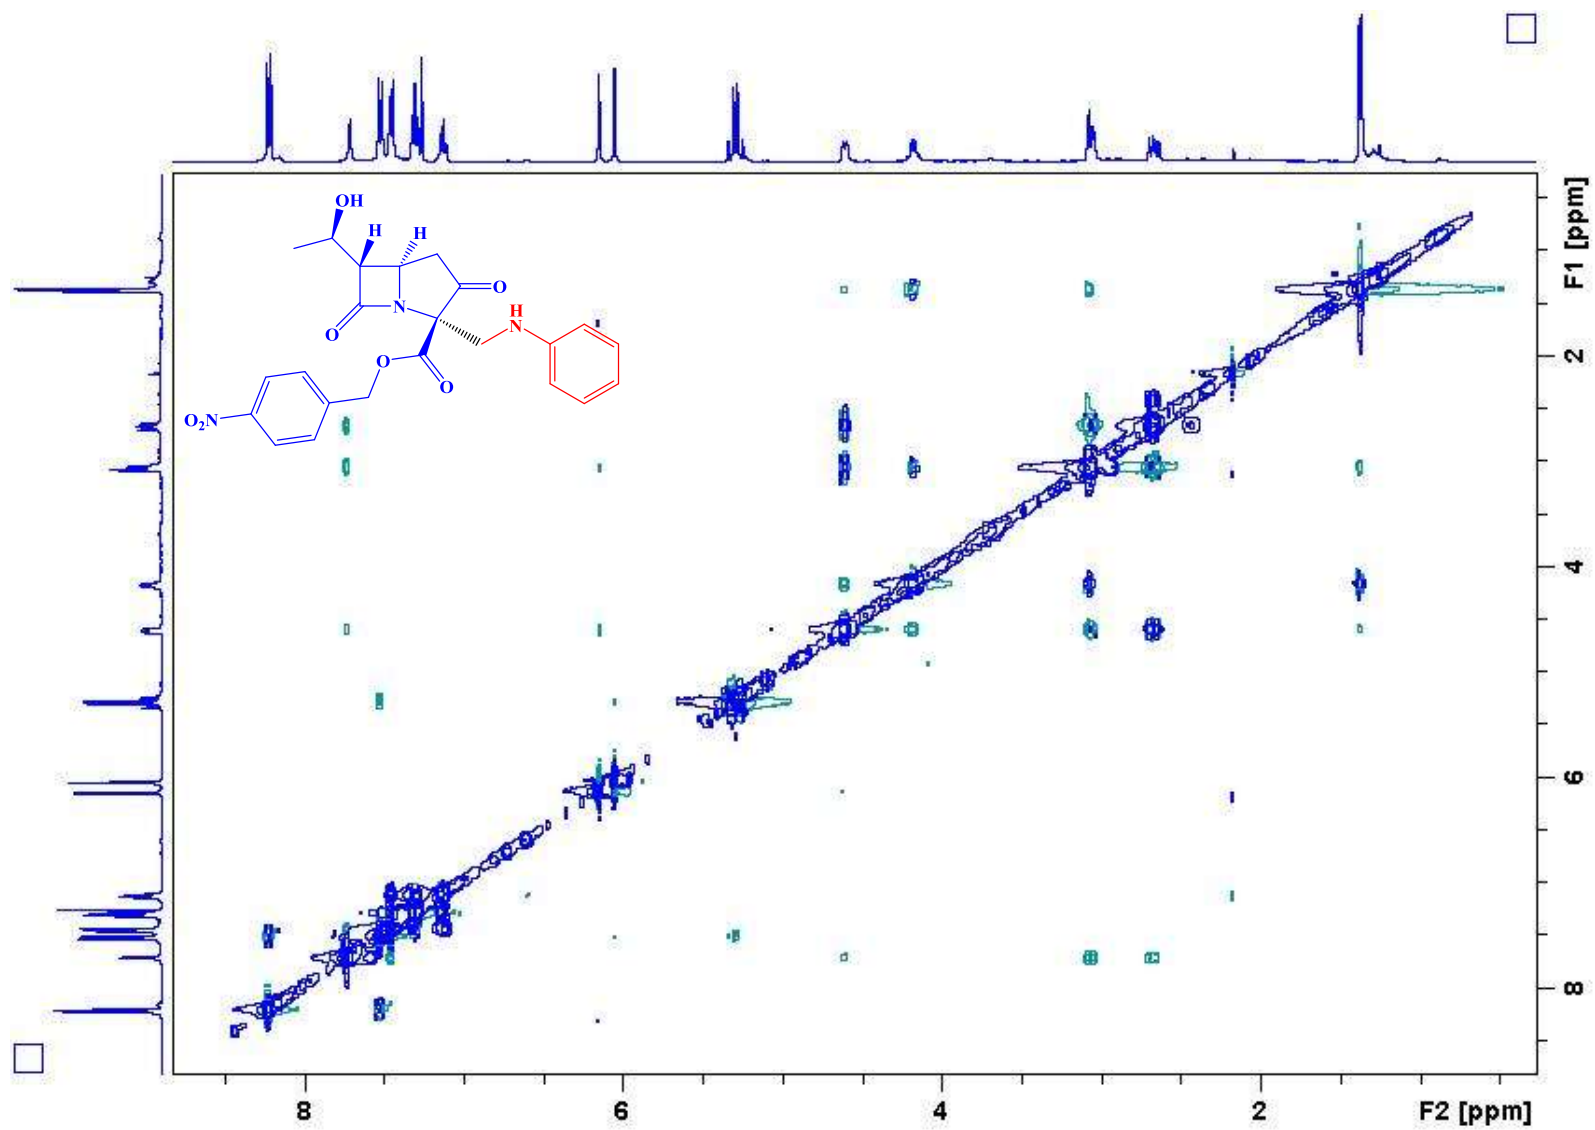

### HSQC of (2*S*,5*R*,6*S*)-4-nitrobenzyl 6-((*R*)-1-hydroxyethyl)-3,7-dioxo-2-((phenylamino)methyl)-1-azabicyclo[3.2.0]heptane-2-carboxylate

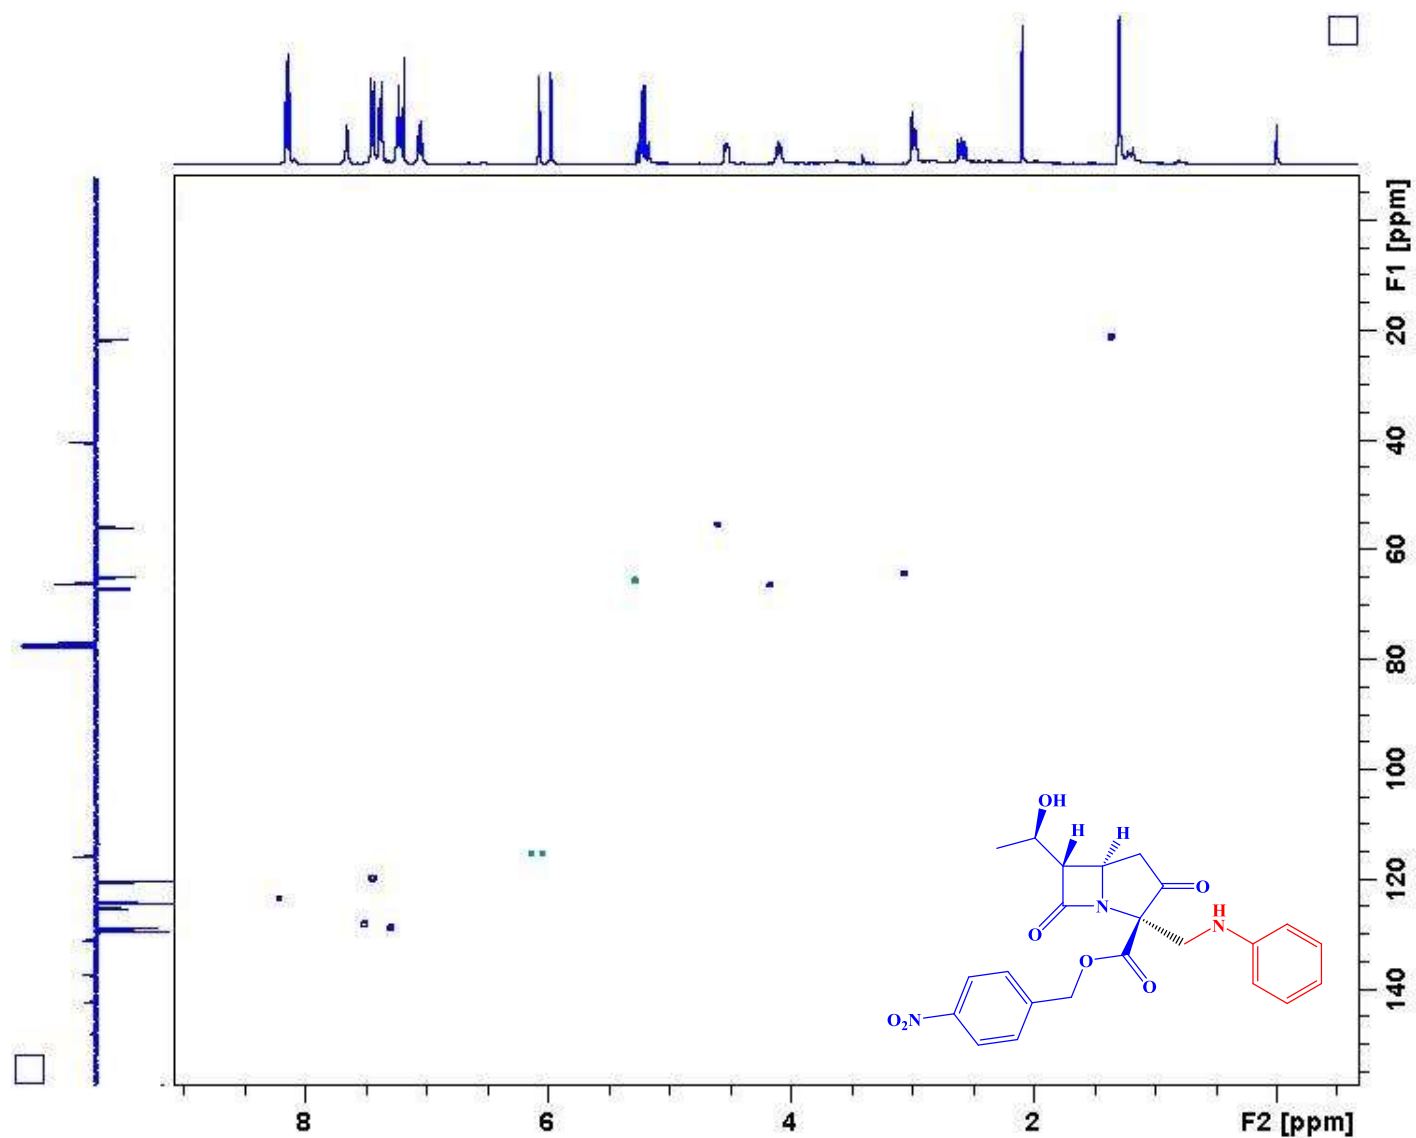

HMBC of (2*S*,5*R*,6*S*)-4-nitrobenzyl 6-((*R*)-1-hydroxyethyl)-3,7-dioxo-2-((phenylamino)methyl)-1-azabicyclo[3.2.0]heptane-2-carboxylate

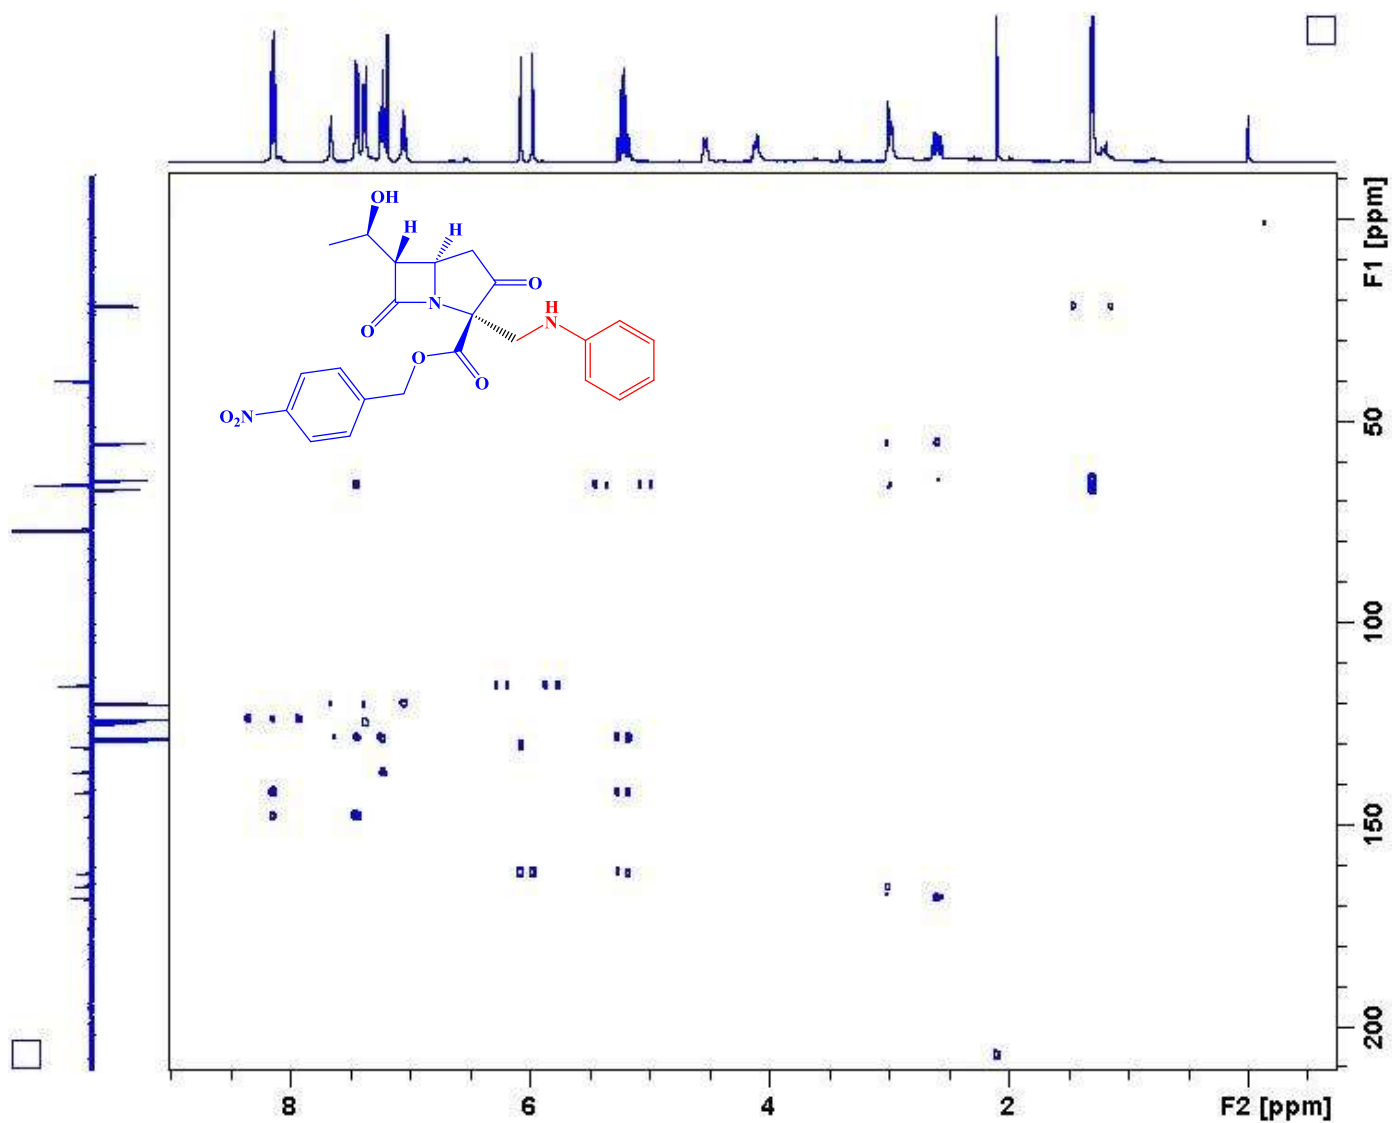

**<sup>1</sup>H-NMR spectra of (2*S*,5*R*,6*S*)-4-nitrobenzyl 6-((*R*)-1-hydroxyethyl)-2-((4-methoxyphenylamino)methyl)-3,7-dioxo-1-azabicyclo[3.2.0]heptane-2-carboxylate**

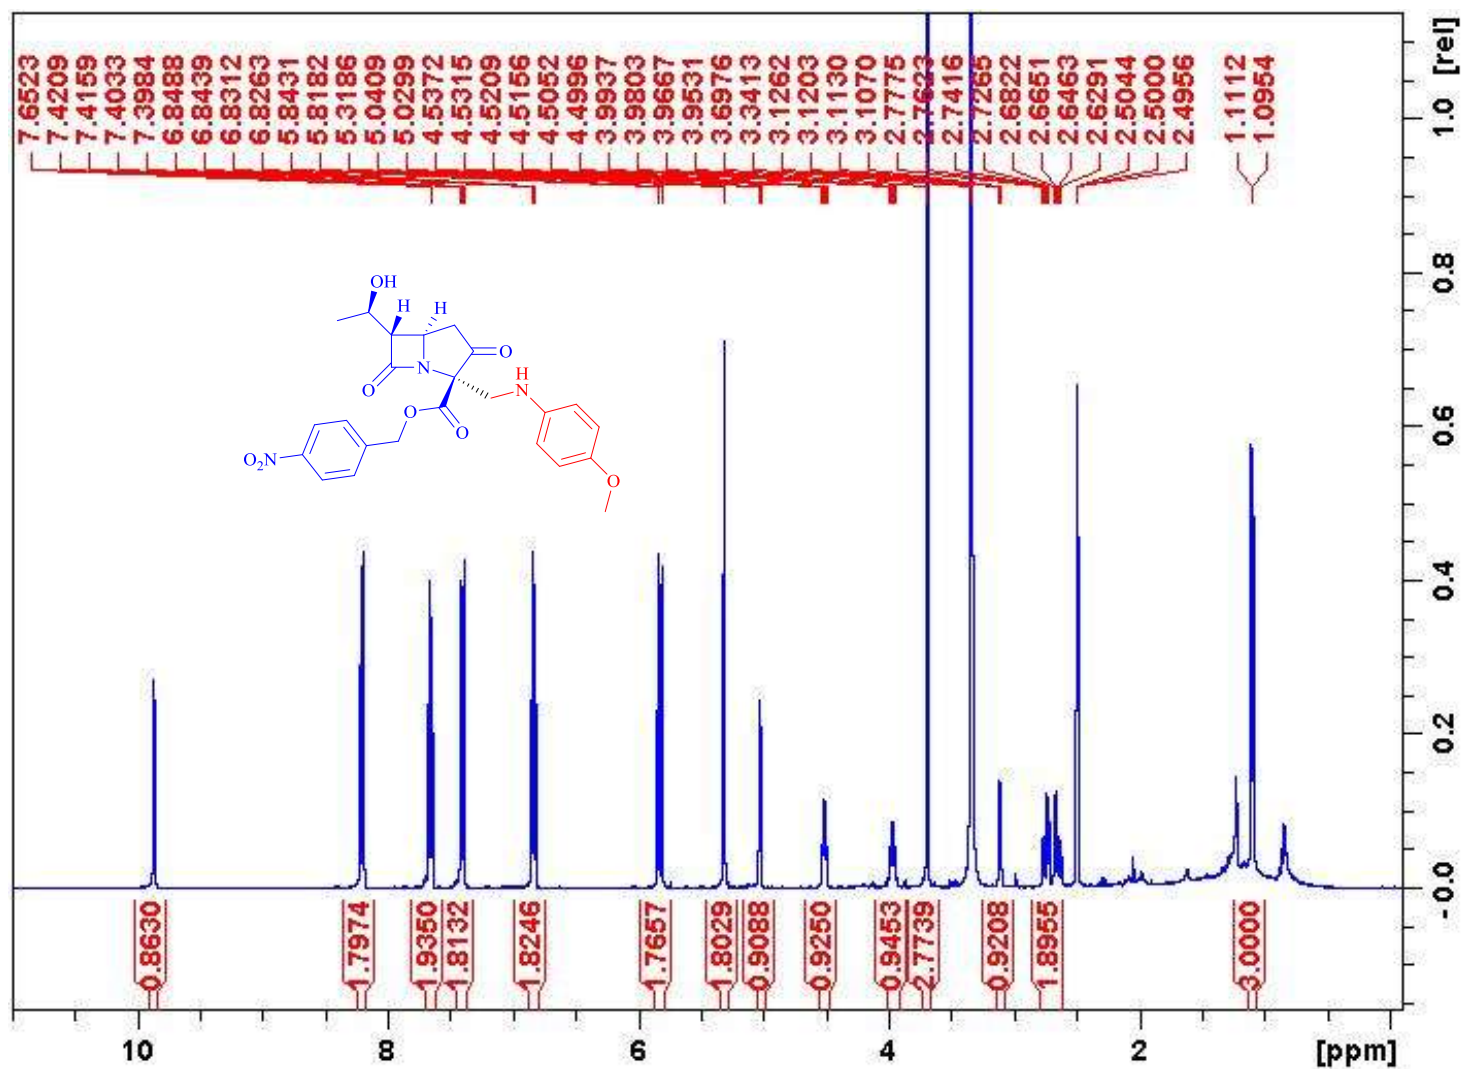

$^{13}\text{C}$ -NMR spectra of (2*S*,5*R*,6*S*)-4-nitrobenzyl 6-((*R*)-1-hydroxyethyl)-2-((4-methoxyphenylamino)methyl)-3,7-dioxo-1-azabicyclo[3.2.0]heptane-2-carboxylate

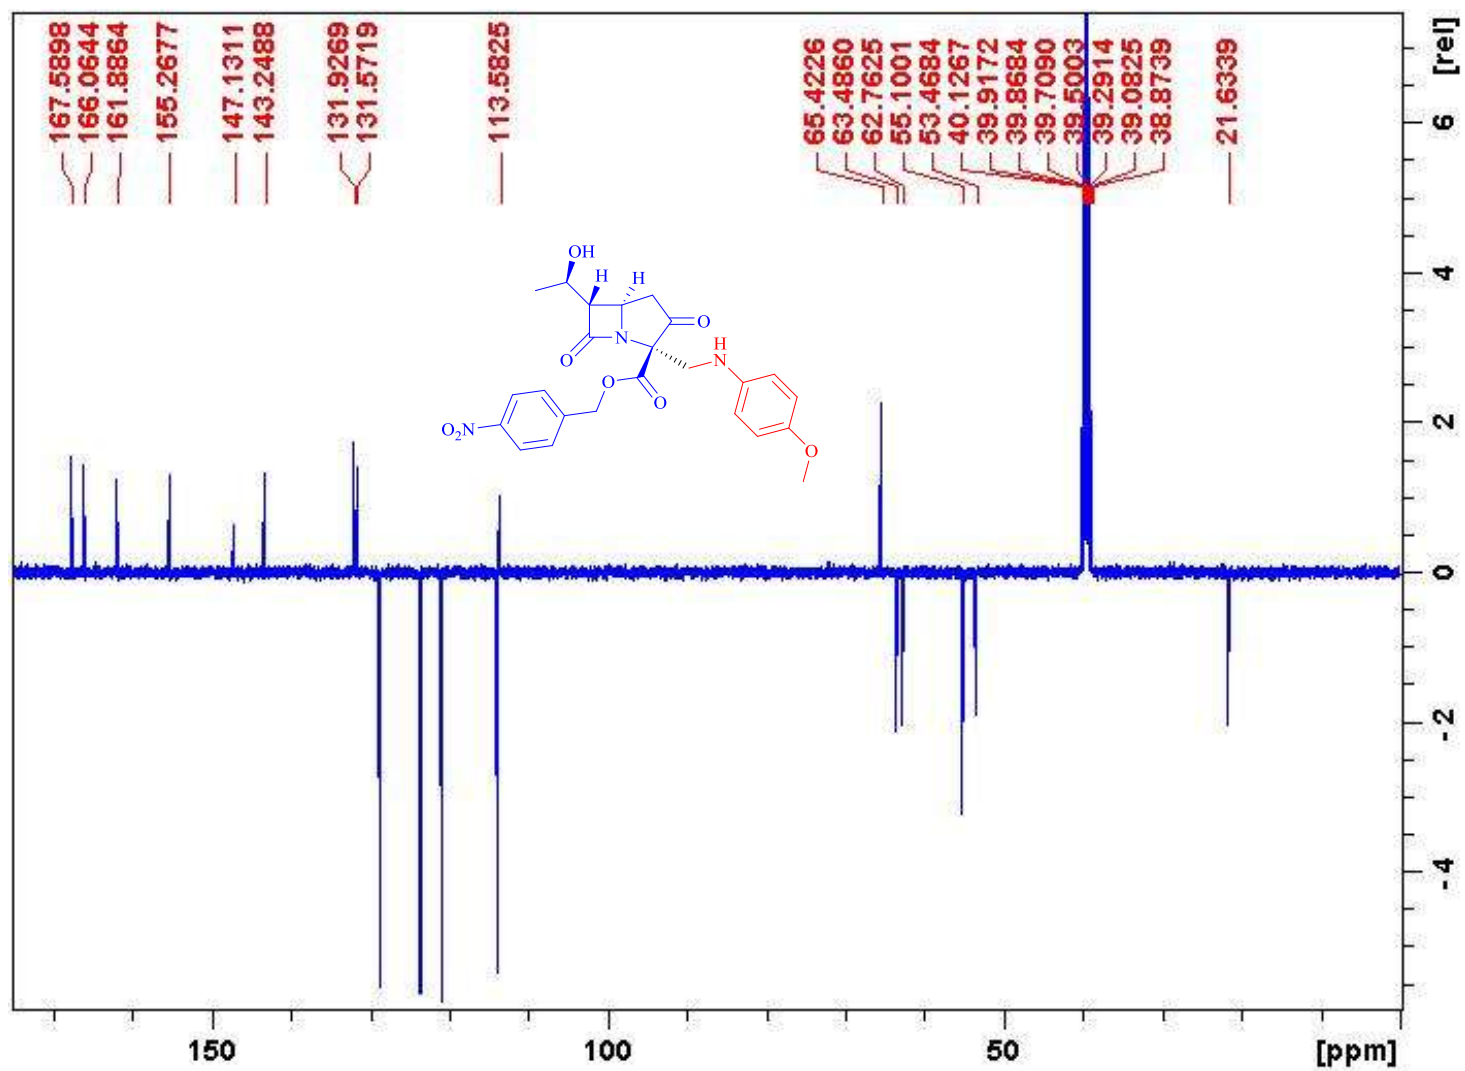

$^{13}\text{C}$ -NMR spectra of (2*S*,5*R*,6*S*)-4-nitrobenzyl 2-((4-bromophenylamino)methyl)-6-((*R*)-1-hydroxyethyl)-3,7-dioxo-1-azabicyclo[3.2.0]heptane-2-carboxylate

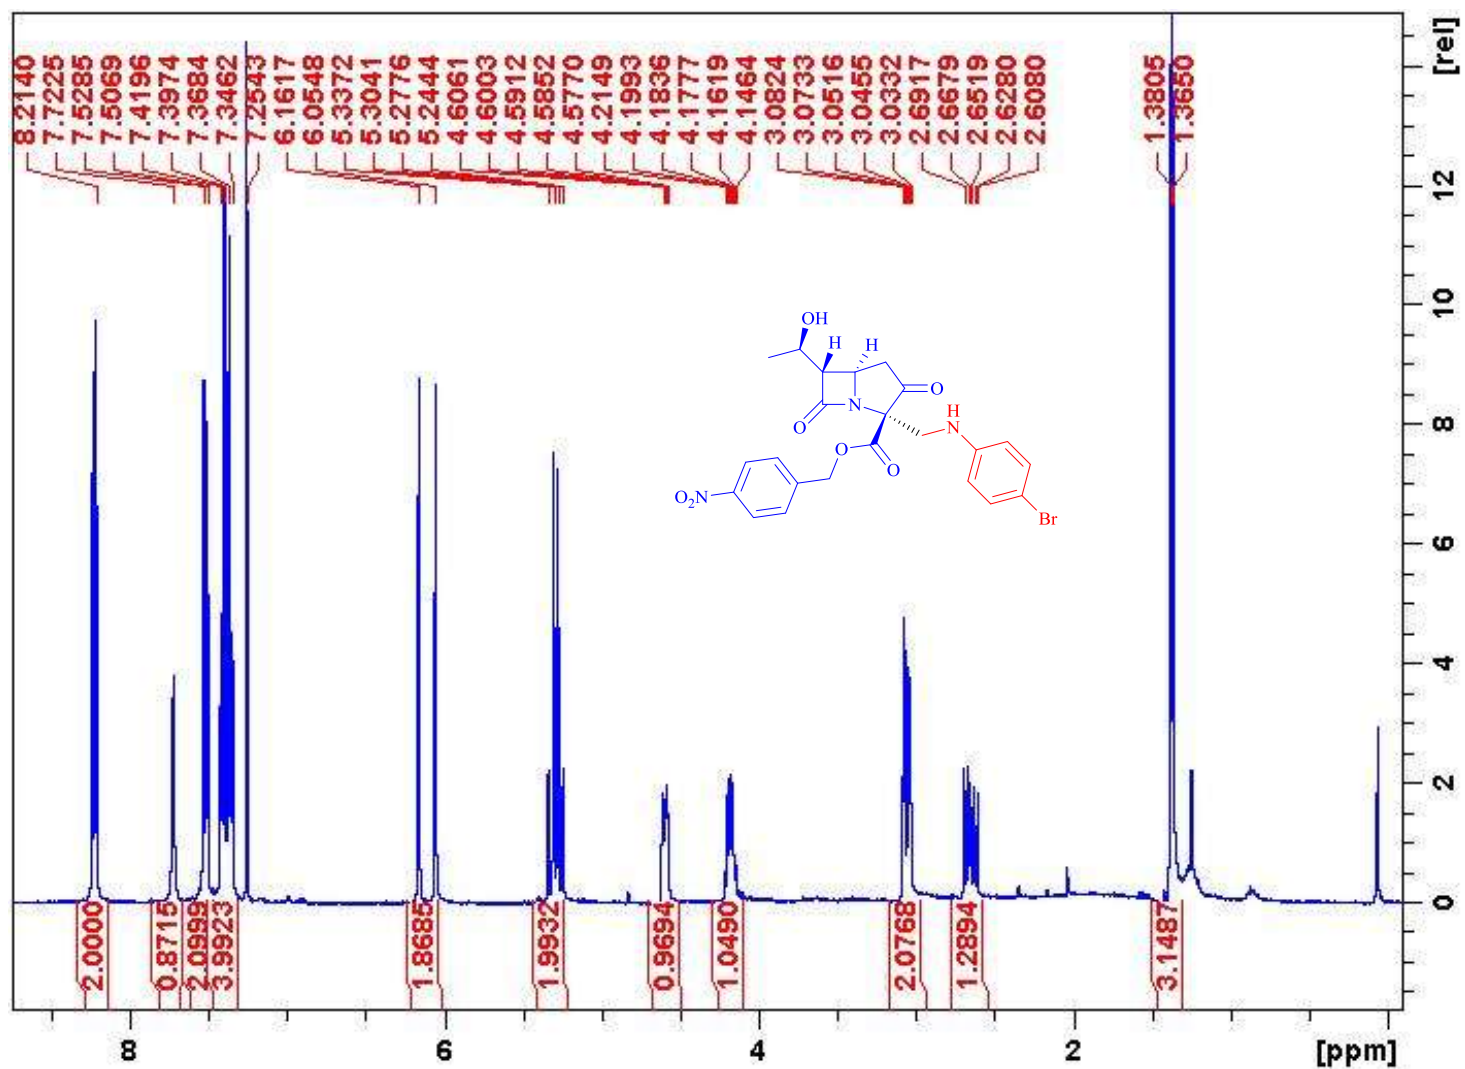

<sup>13</sup>C-NMR spectra of (2*S*,5*R*,6*S*)-4-nitrobenzyl 2-((4-bromophenylamino)methyl)-6-((*R*)-1-hydroxyethyl)-3,7-dioxo-1-azabicyclo[3.2.0]heptane-2-carboxylate

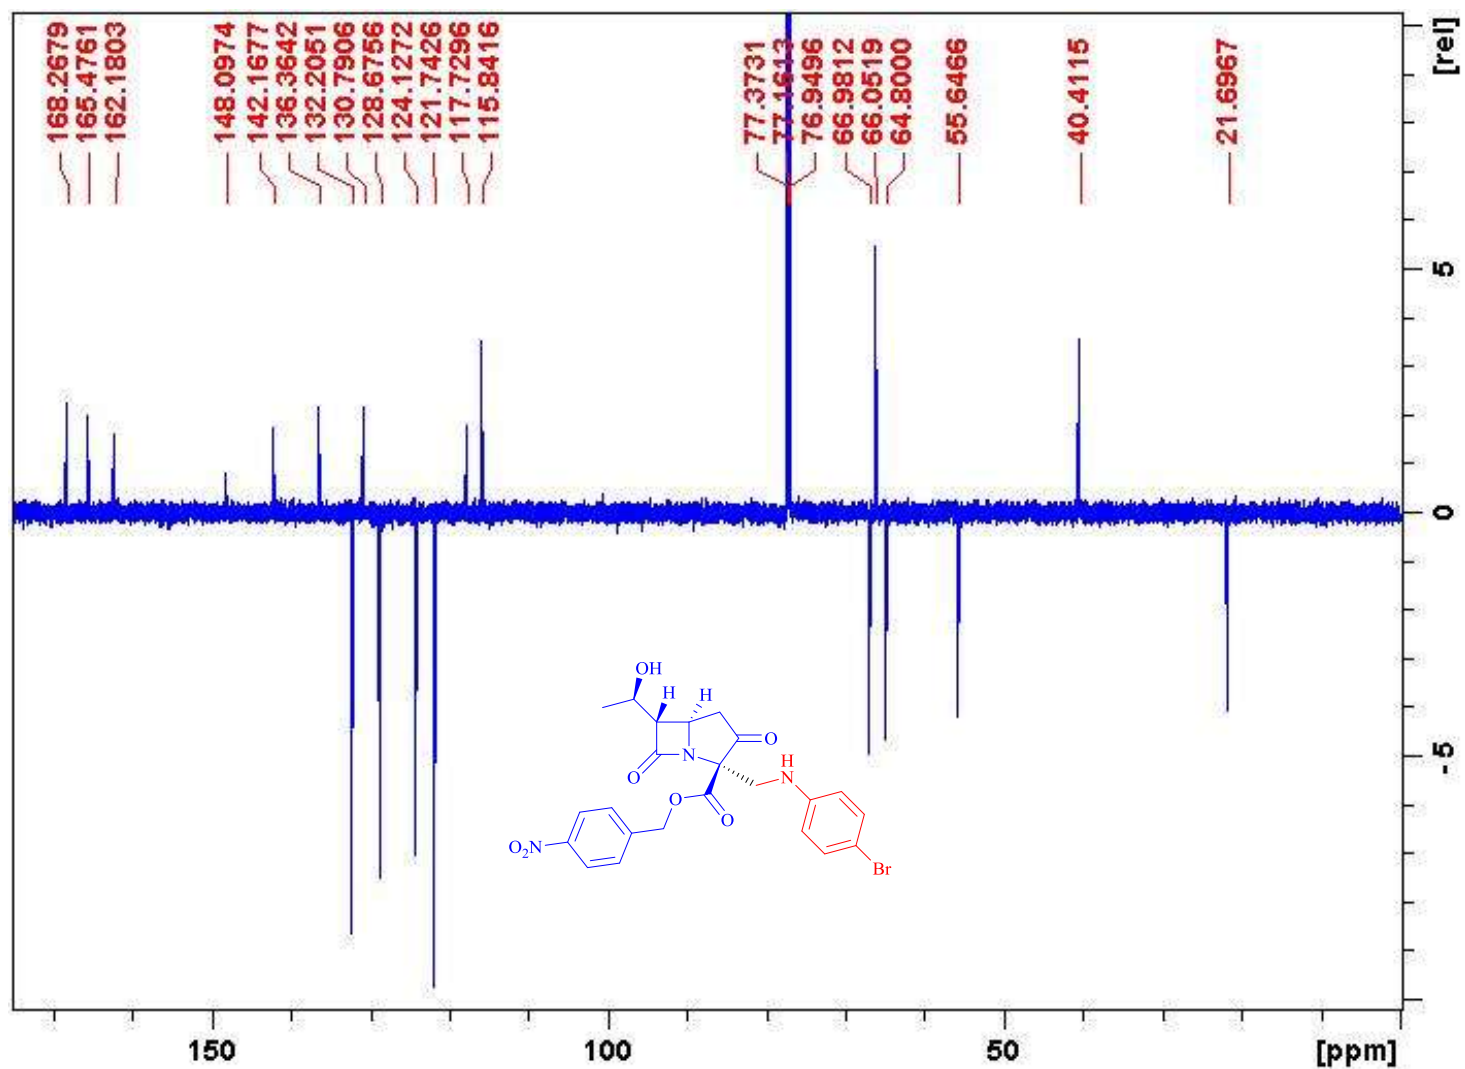



**<sup>1</sup>H-NMR spectra of (2*S*,5*R*,6*S*)-4-nitrobenzyl 6-((*R*)-1-hydroxyethyl)-2-((*S*)-1-(4-methoxyphenyl)-2-nitroethyl)-3,7-dioxo-1-azabicyclo  
[3.2.0] heptane-2-carboxylate**

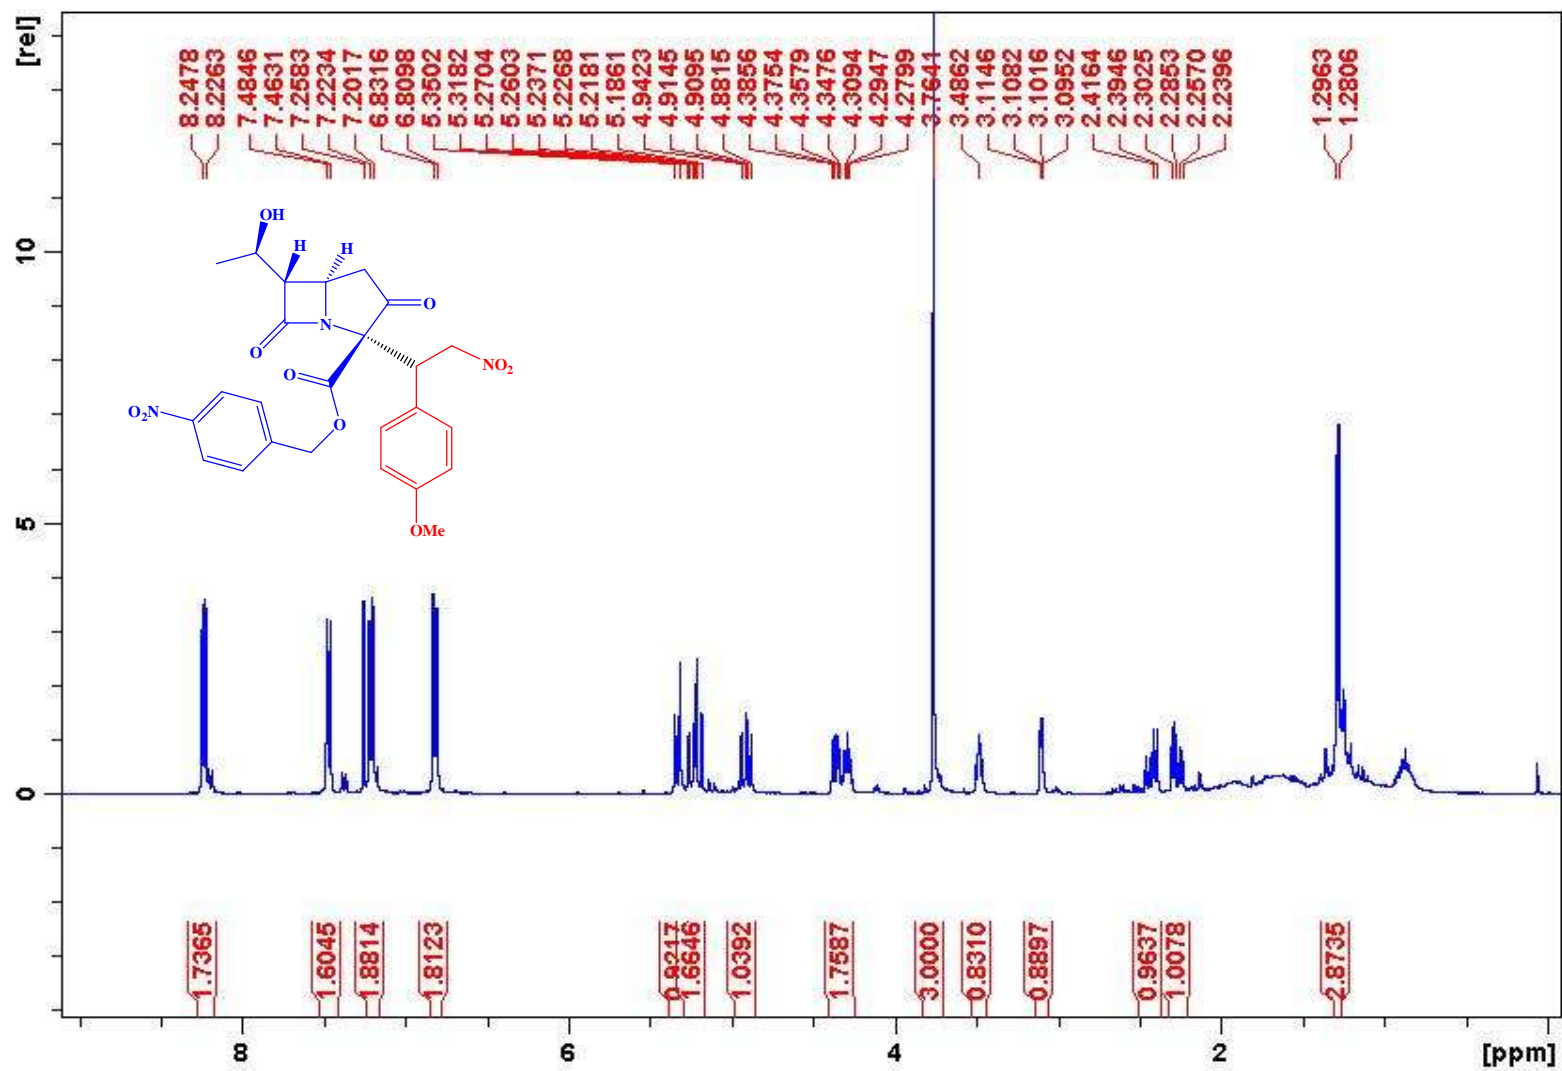

<sup>13</sup>C-NMR spectra of (2*S*,5*R*,6*S*)-4-nitrobenzyl 6-((*R*)-1-hydroxyethyl)-2-((*S*)-1-(4-methoxyphenyl)-2-nitroethyl)-3,7-dioxo-1-azabicyclo  
[3.2.0] heptane-2- carboxylate

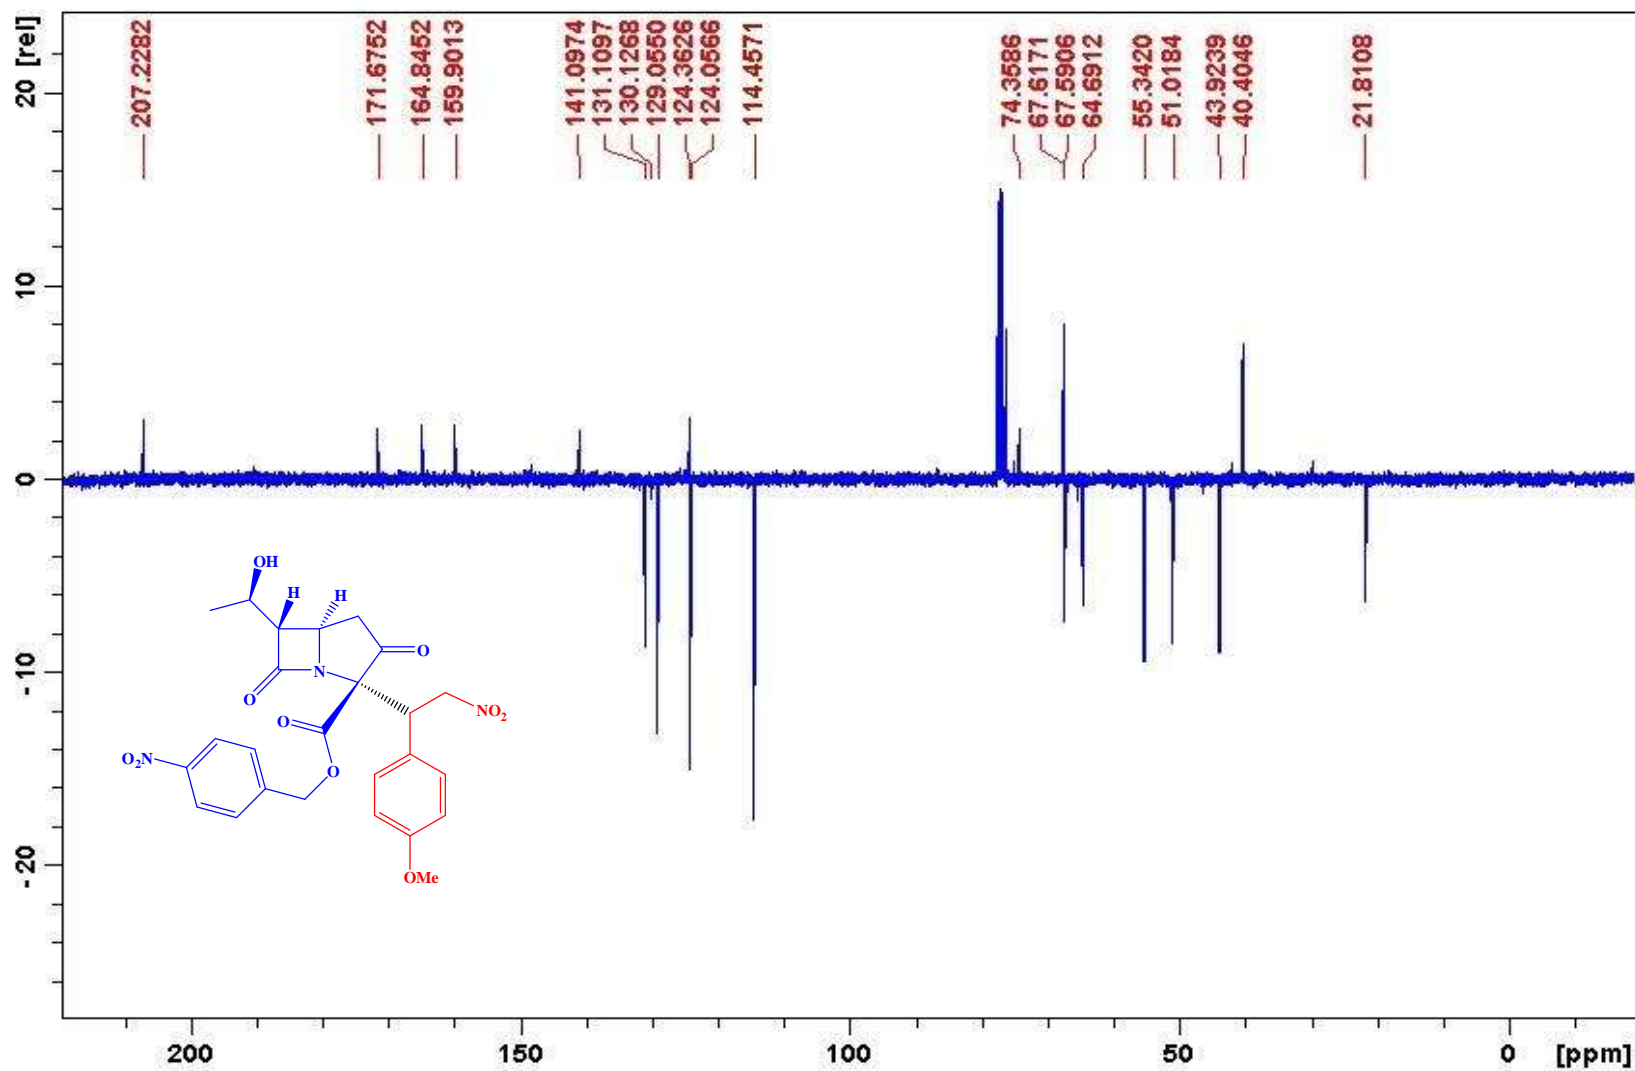

<sup>1</sup>H-NMR (2*S*,5*R*,6*S*)-4-nitrobenzyl 6-((*R*)-1-hydroxyethyl)-3,7-dioxo-2-((*R*)-3-oxocyclopentyl)-1-azabicyclo[3.2.0]heptane-2-carboxylate

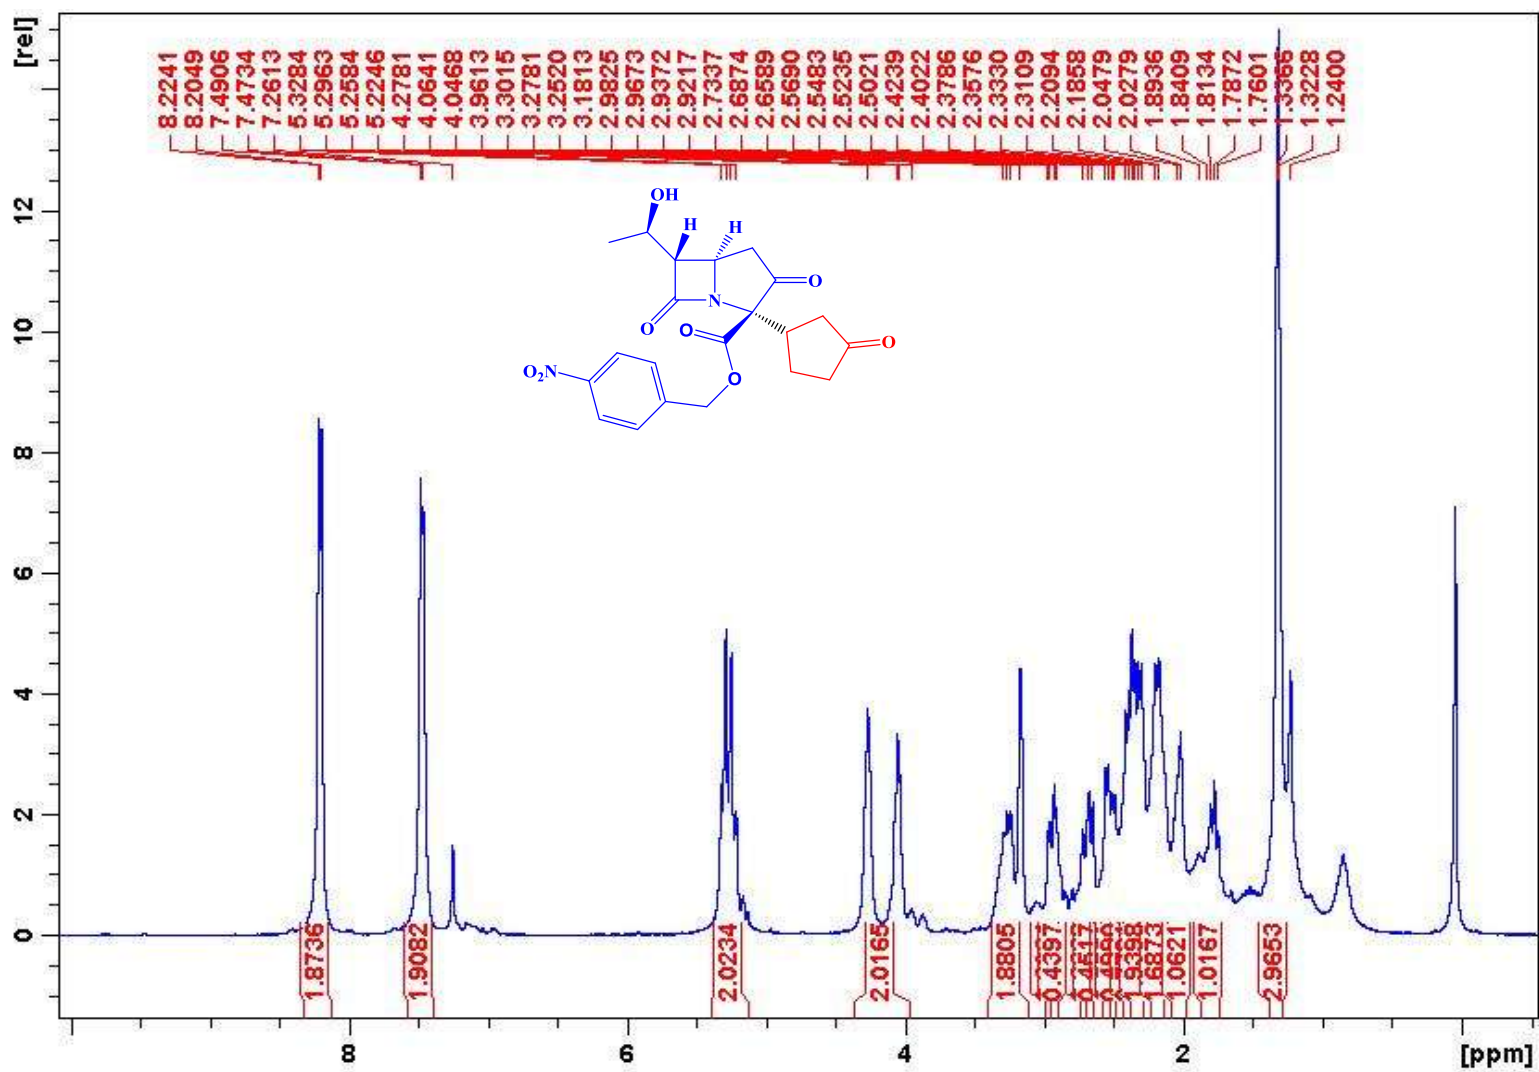

$^{13}\text{C}$ -NMR (2*S*,5*R*,6*S*)-4-nitrobenzyl 6-((*R*)-1-hydroxyethyl)-3,7-dioxo-2-((*R*)-3-oxocyclopentyl)-1-azabicyclo[3.2.0]heptane-2-carboxylate

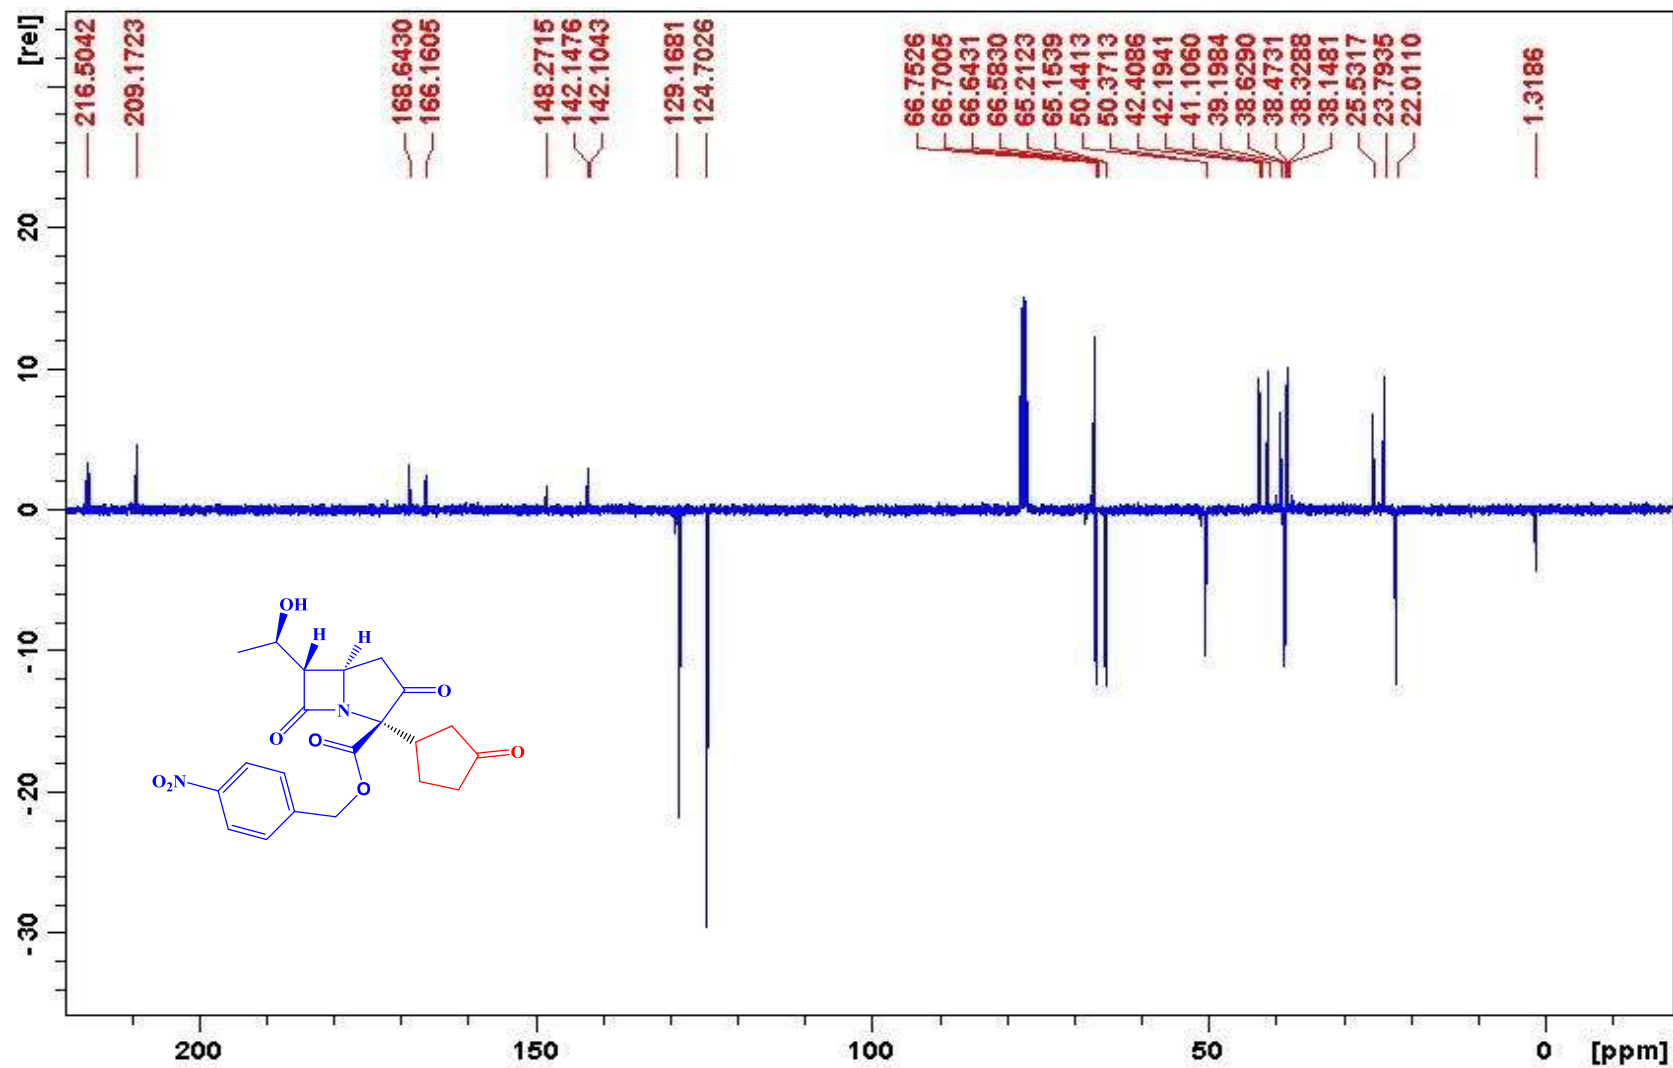

**HRMS of ((2*S*)-4-nitrobenzyl-6-((*R*)-1-hydroxyethyl)-2-(hydroxymethyl)-3,7-dioxo-1-azabicyclo[3.2.0]heptane-2-carboxylate)**

Display Report

Analysis Info

Analysis Name D:\Data\saba\saba377000001.d  
Method tune\_mid.m  
Sample Name saba377  
Comment

Acquisition Date 8/30/2013 4:09:19 PM

Operator BDAL@DE  
Instrument maXis 21230

Acquisition Parameter

|             |          |                       |            |                  |           |
|-------------|----------|-----------------------|------------|------------------|-----------|
| Source Type | ESI      | Ion Polarity          | Negative   | Set Nebulizer    | 0.4 Bar   |
| Focus       | Active   | Set Capillary         | 2400 V     | Set Dry Heater   | 180 °C    |
| Scan Begin  | 200 m/z  | Set End Plate Offset  | -500 V     | Set Dry Gas      | 4.0 l/min |
| Scan End    | 2900 m/z | Set Collision Cell RF | 2000.0 Vpp | Set Divert Valve | Source    |

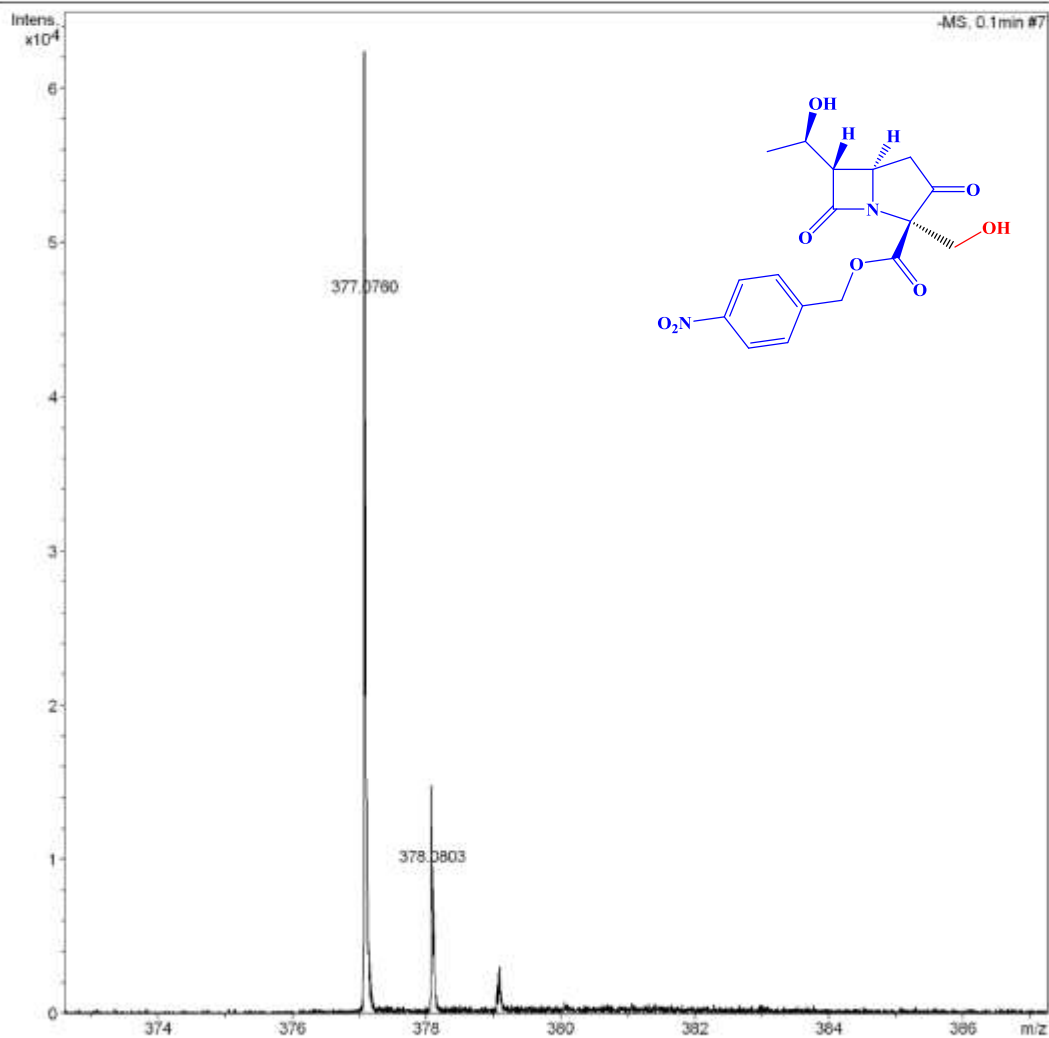

## HRMS of (2S)-nitrobenzyl2-((R)-hydroxy(phenyl)methyl)-6-(1-hydroxyethyl)-3,7-dioxo-1-azabicyclo[3.2.0]heptane-2-carboxylate

### Display Report

#### Analysis Info

Analysis Name D:\Data\saba\saba454000001.d  
Method tune\_mid.m  
Sample Name saba454  
Comment

Acquisition Date 8/30/2013 4:18:14 PM

Operator BDAL@DE  
Instrument maXis 21230

#### Acquisition Parameter

|             |          |                       |            |                  |           |
|-------------|----------|-----------------------|------------|------------------|-----------|
| Source Type | ESI      | Ion Polarity          | Negative   | Set Nebulizer    | 0.4 Bar   |
| Focus       | Active   | Set Capillary         | 2400 V     | Set Dry Heater   | 180 °C    |
| Scan Begin  | 200 m/z  | Set End Plate Offset  | -500 V     | Set Dry Gas      | 4.0 l/min |
| Scan End    | 2900 m/z | Set Collision Cell RF | 2000.0 Vpp | Set Divert Valve | Source    |

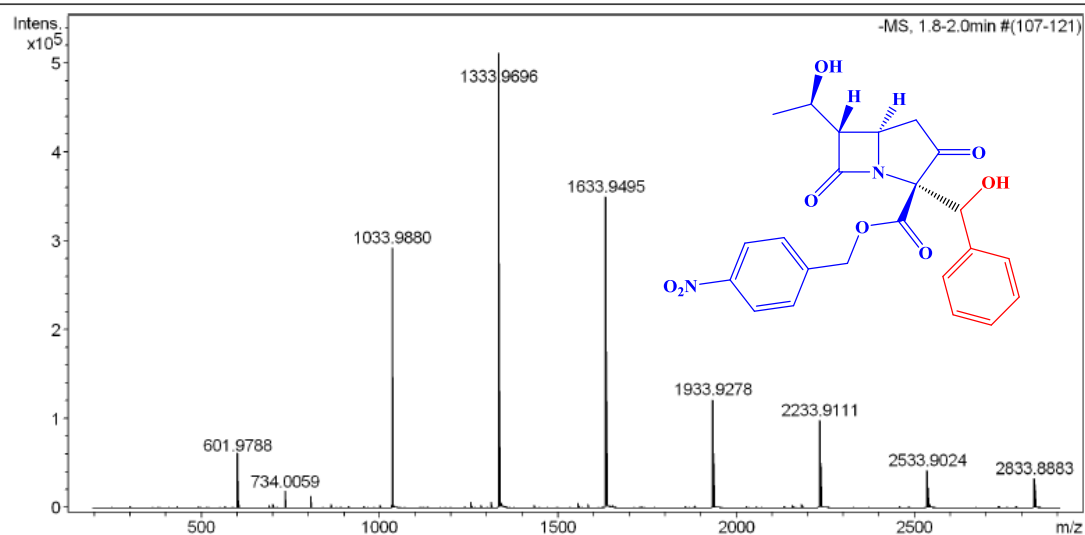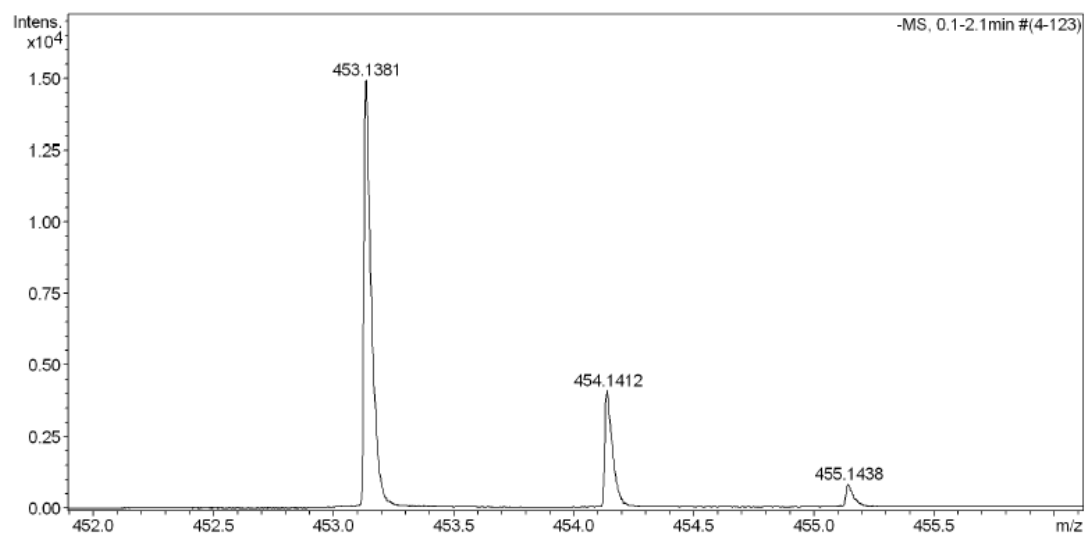

## HRMS of (2*S*,5*R*,6*S*)-4-nitrobenzyl 6-((*R*)-1-hydroxyethyl)-3,7-dioxo-2-((phenylamino) methyl)-1-azabicyclo[3.2.0]heptane-2-carboxylate

### Display Report

#### Analysis Info

Analysis Name D:\Data\sachin\454000001.d  
Method tune\_mid.m  
Sample Name 454  
Comment

Acquisition Date 8/30/2013 4:27:33 PM

Operator BDAL@DE  
Instrument maXis 21230

#### Acquisition Parameter

|             |          |                       |            |                  |           |
|-------------|----------|-----------------------|------------|------------------|-----------|
| Source Type | ESI      | Ion Polarity          | Positive   | Set Nebulizer    | 0.4 Bar   |
| Focus       | Active   | Set Capillary         | 3500 V     | Set Dry Heater   | 180 °C    |
| Scan Begin  | 200 m/z  | Set End Plate Offset  | -500 V     | Set Dry Gas      | 4.0 l/min |
| Scan End    | 2900 m/z | Set Collision Cell RF | 2000.0 Vpp | Set Divert Valve | Source    |

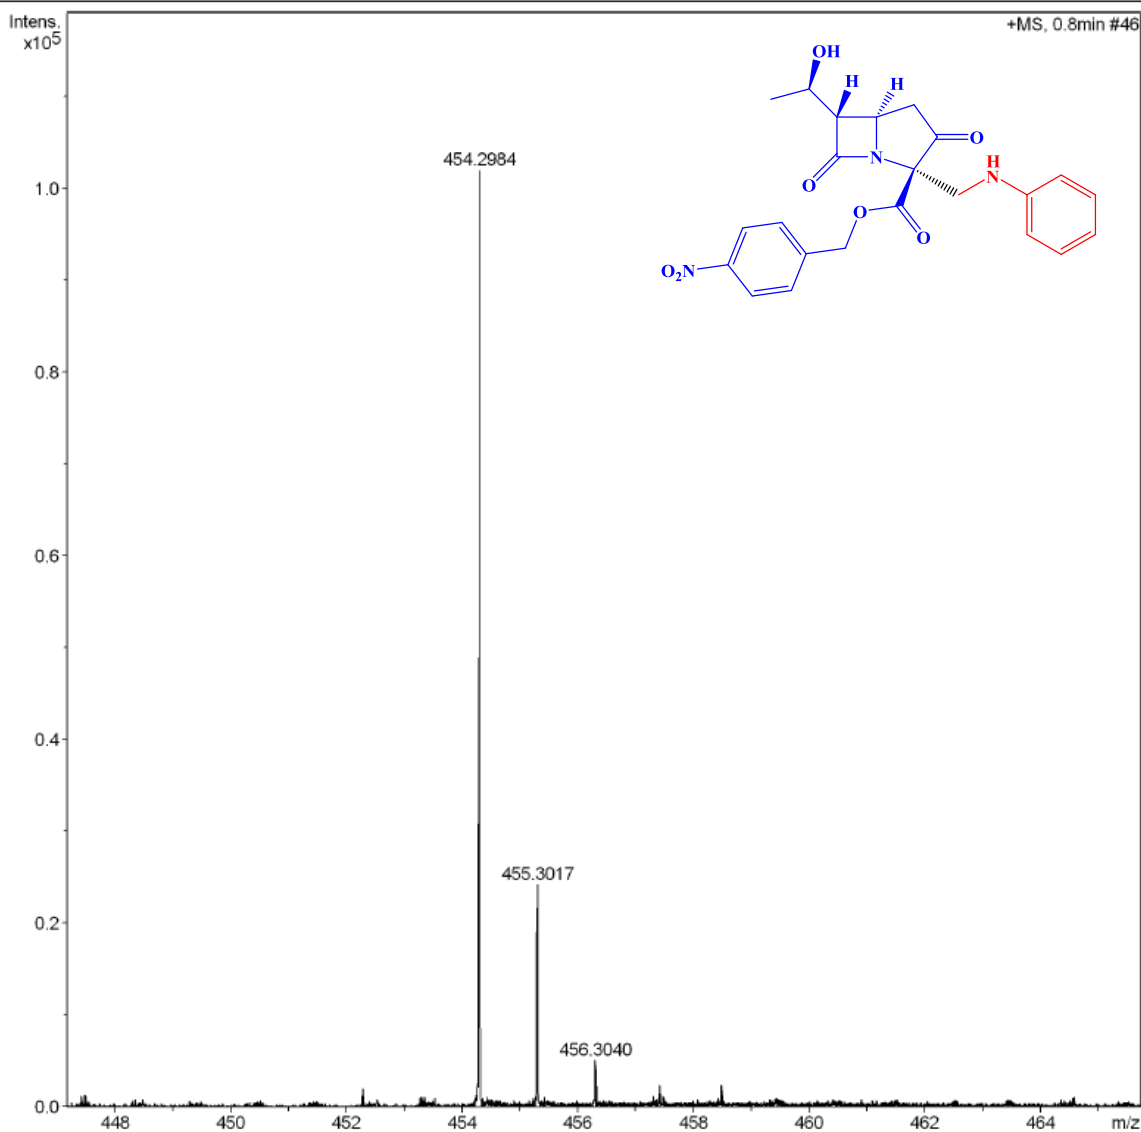

**HRMS of (2*S*,5*R*,6*S*)-4-nitrobenzyl 6-((*R*)-1-hydroxyethyl)-2-((4-methoxyphenylamino)methyl)-3,7-dioxo-1-azabicyclo[3.2.0]heptane-2-carboxylate**

**Display Report**

**Analysis Info**

Analysis Name D:\Data\thavi\methoxy.d  
Method fia.m  
Sample Name tunemix  
Comment

Acquisition Date 10/16/2013 12:55:41 PM

Operator BDAL@DE  
Instrument micrOTOF-Q 10139

**Acquisition Parameter**

|             |            |                       |           |                  |           |
|-------------|------------|-----------------------|-----------|------------------|-----------|
| Source Type | ESI        | Ion Polarity          | Positive  | Set Nebulizer    | 0.4 Bar   |
| Focus       | Not active | Set Capillary         | 4500 V    | Set Dry Heater   | 200 °C    |
| Scan Begin  | 50 m/z     | Set End Plate Offset  | -500 V    | Set Dry Gas      | 4.0 l/min |
| Scan End    | 3000 m/z   | Set Collision Cell RF | 500.0 Vpp | Set Divert Valve | Source    |

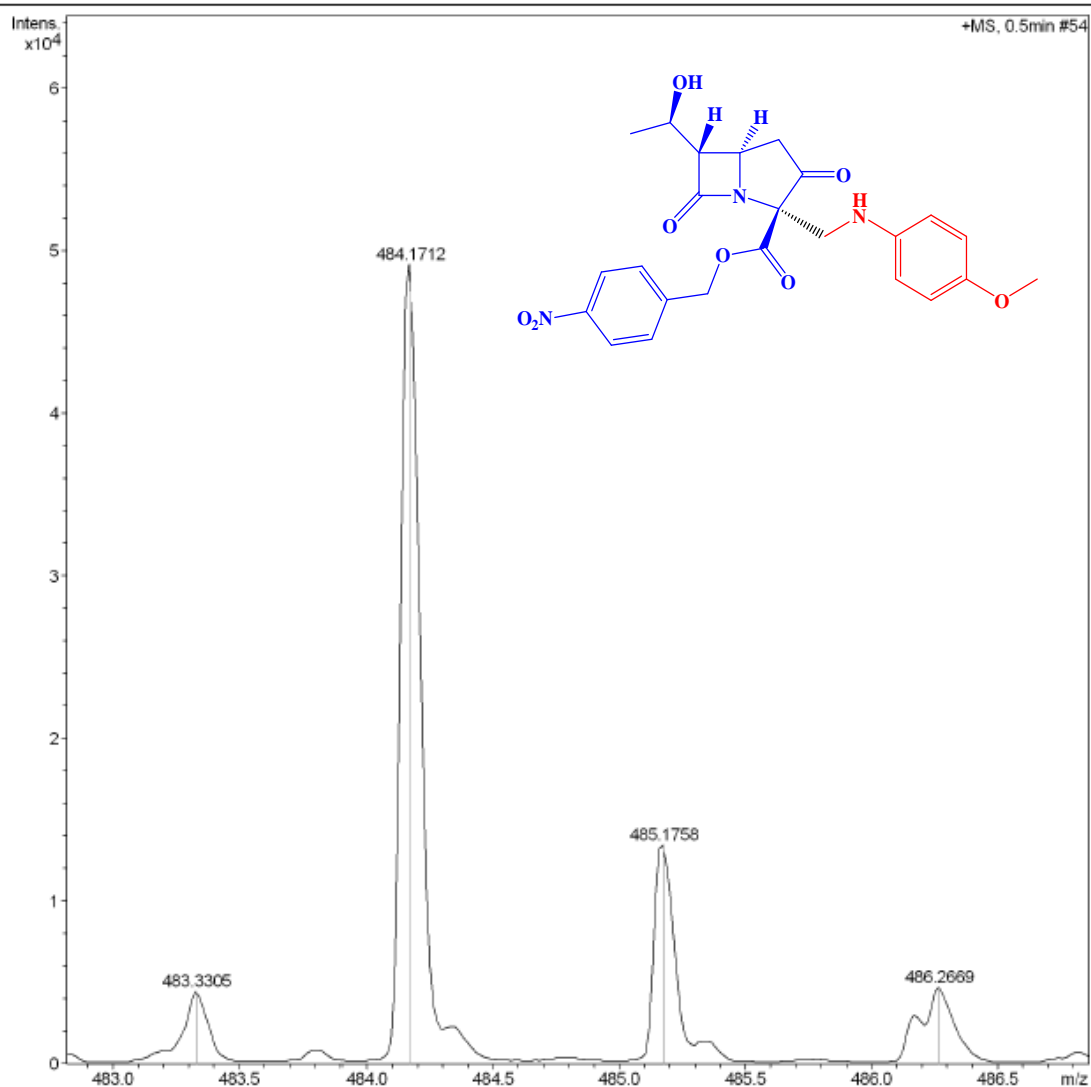



**HRMS of (2*S*,5*R*,6*S*)-4-nitrobenzyl 2-((4-bromophenylamino)methyl)-6-((*R*)-1-hydroxyethyl)-3,7-dioxo-1-azabicyclo[3.2.0]heptane-2-carboxylate**

Display Report

Analysis Info

Analysis Name D:\Data\thavi\bromo.d  
Method fia\_neg.m  
Sample Name tunemix  
Comment

Acquisition Date 10/16/2013 12:39:47 PM

Operator BDAL@DE  
Instrument micrOTOF-Q 10139

Acquisition Parameter

|             |            |                       |           |                  |           |
|-------------|------------|-----------------------|-----------|------------------|-----------|
| Source Type | ESI        | Ion Polarity          | Negative  | Set Nebulizer    | 0.4 Bar   |
| Focus       | Not active | Set Capillary         | 3500 V    | Set Dry Heater   | 200 °C    |
| Scan Begin  | 50 m/z     | Set End Plate Offset  | -500 V    | Set Dry Gas      | 4.0 l/min |
| Scan End    | 3000 m/z   | Set Collision Cell RF | 500.0 Vpp | Set Divert Valve | Source    |

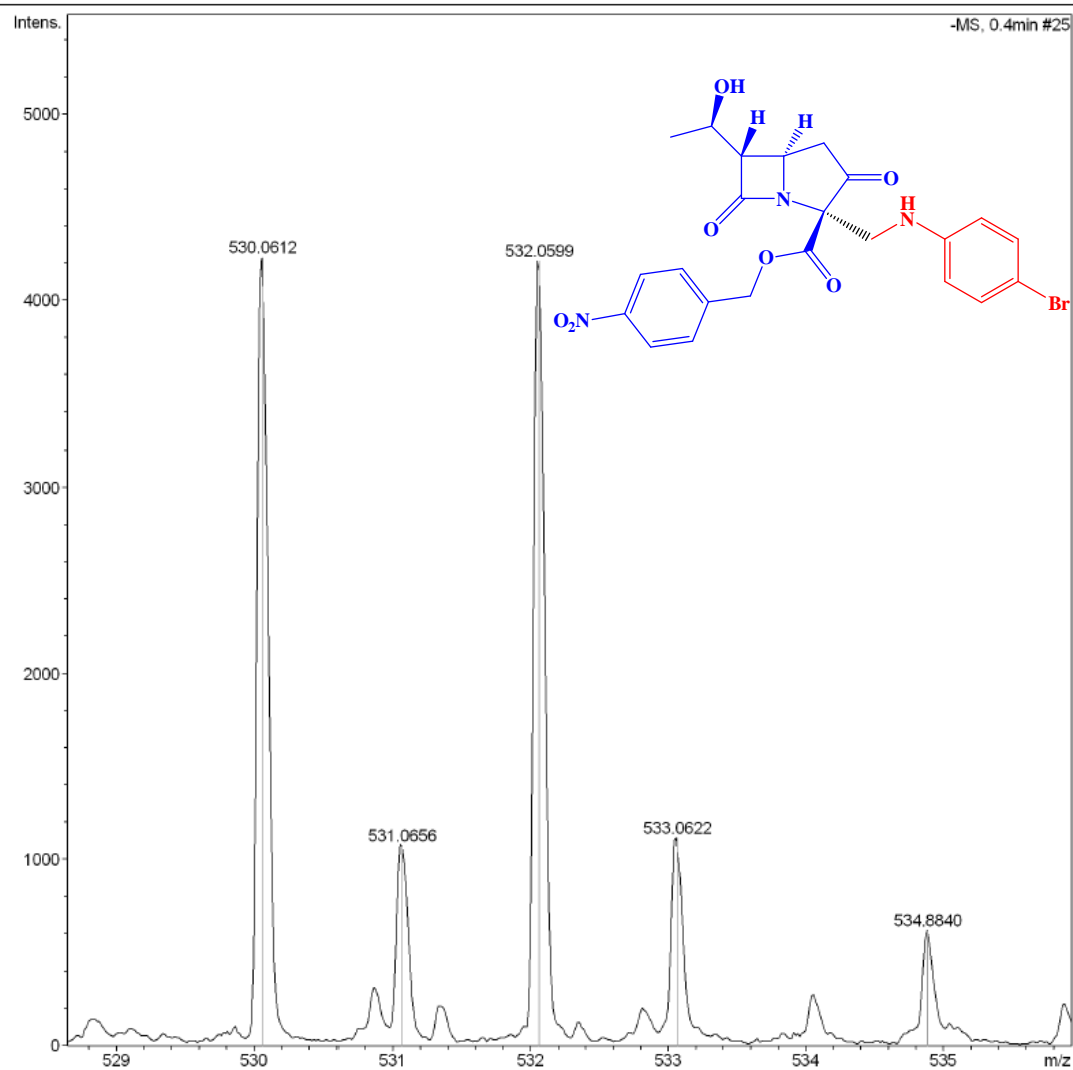

**HRMS of (2*S*,5*R*,6*S*)-4-nitrobenzyl 6-((*R*)-1-hydroxyethyl)-2-((*S*)-1-(4-methoxy phenyl)-2-nitroethyl)-3,7-dioxo-1-azabicyclo [3.2.0] heptane-2-carboxylate**

Display Report

Analysis Info

Analysis Name D:\Data\sibusiso\st527000002.d  
Method tune\_mid.m  
Sample Name st527  
Comment

Acquisition Date 8/30/2013 3:17:00 PM

Operator BDAL@DE  
Instrument maXis 21230

Acquisition Parameter

|             |          |                       |            |                  |           |
|-------------|----------|-----------------------|------------|------------------|-----------|
| Source Type | ESI      | Ion Polarity          | Positive   | Set Nebulizer    | 0.4 Bar   |
| Focus       | Active   | Set Capillary         | 3500 V     | Set Dry Heater   | 180 °C    |
| Scan Begin  | 200 m/z  | Set End Plate Offset  | -500 V     | Set Dry Gas      | 4.0 l/min |
| Scan End    | 2900 m/z | Set Collision Cell RF | 2000.0 Vpp | Set Divert Valve | Source    |

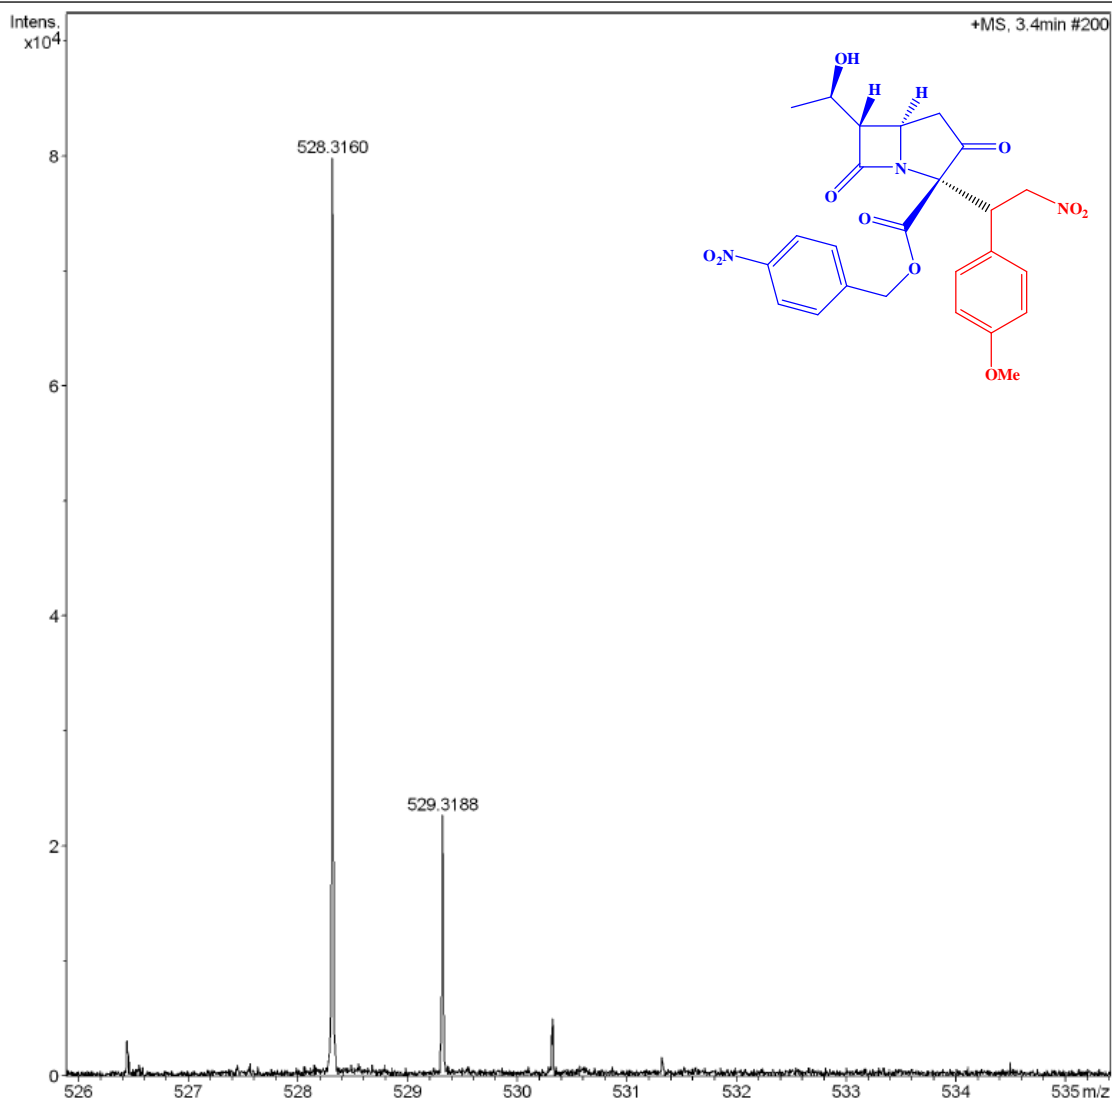

## HRMS of (2*S*,5*R*,6*S*)-4-nitrobenzyl 6-((*R*)-1-hydroxyethyl)-3,7-dioxo-2-((*R*)-3-oxoclopentyl)-1-azabicyclo[3.2.0]heptane-2-carboxylate

### Display Report

#### Analysis Info

Analysis Name D:\Data\sibusiso\430000001.d  
Method tune\_mid.m  
Sample Name 430  
Comment

Acquisition Date 8/30/2013 4:23:05 PM

Operator BDAL@DE  
Instrument maXis 21230

#### Acquisition Parameter

|             |          |                       |            |                  |           |
|-------------|----------|-----------------------|------------|------------------|-----------|
| Source Type | ESI      | Ion Polarity          | Negative   | Set Nebulizer    | 0.4 Bar   |
| Focus       | Active   | Set Capillary         | 2400 V     | Set Dry Heater   | 180 °C    |
| Scan Begin  | 200 m/z  | Set End Plate Offset  | -500 V     | Set Dry Gas      | 4.0 l/min |
| Scan End    | 2900 m/z | Set Collision Cell RF | 2000.0 Vpp | Set Divert Valve | Source    |

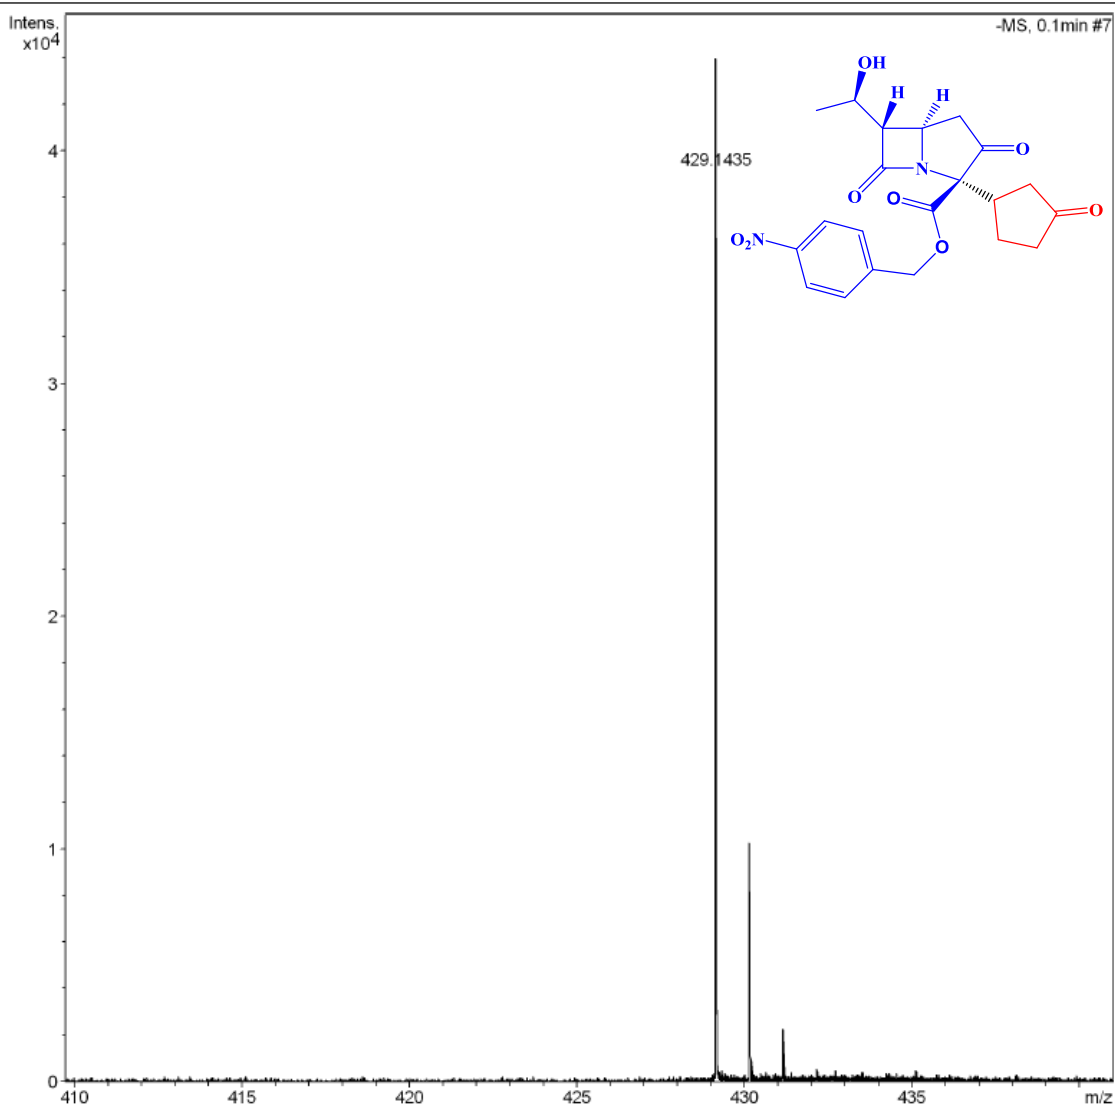

Supplement: c3ob41858h.pdf [file c3ob41858h.pdf]
